1 **Intestinal Paneth cell differentiation relies on asymmetric regulation of Wnt**  
2 **signaling by Daam1/2**

3  
4 Gabriele Colozza<sup>1\*</sup>, Heetak Lee<sup>1,2\*</sup>, Alessandra Merenda<sup>3\*</sup>, Szu-Hsien Sam Wu<sup>1</sup>,  
5 Andrea Català-Bordes<sup>1</sup>, Tomasz W. Radaszkiewicz<sup>4</sup>, Ingrid Jordens<sup>5</sup>, Ji-Hyun Lee<sup>1,2</sup>,  
6 Aileen-Diane Bamford<sup>1,6</sup>, Fiona Farnhammer<sup>1,7</sup>, Teck Yew Low<sup>8</sup>, Madelon M. Maurice<sup>5</sup>,  
7 Vítězslav Bryja<sup>4,9</sup>, Jihoon Kim<sup>1,10†</sup> and Bon-Kyoung Koo<sup>1,2†</sup>

8  
9  
10  
11 <sup>1</sup> Institute of Molecular Biotechnology of the Austrian Academy of Sciences (IMBA),  
12 Vienna Biocenter (VBC), 1030, Austria

13 <sup>2</sup> Center for Genome Engineering, Institute for Basic Science, 55, Expo-ro, Yuseong-  
14 gu, Daejeon, 34126, Republic of Korea

15 <sup>3</sup> HUB Organoids, Utrecht, the Netherlands

16 <sup>4</sup> Department of Experimental Biology, Faculty of Science, Masaryk University, Brno,  
17 Czech Republic

18 <sup>5</sup> Oncode Institute and Centre for Molecular Medicine, University Medical Centre  
19 Utrecht, Utrecht, the Netherlands

20 <sup>6</sup> Department of Biosystems Science and Engineering, ETH Zurich, Mattenstrasse 26,  
21 4058 Basel, Switzerland

22 <sup>7</sup> Division of Metabolism and Division of Oncology, University Children's Hospital  
23 Zurich and Children's Research Center, University of Zurich, Zurich, 8032, Switzerland

24 <sup>8</sup> UKM Medical Molecular Biology Institute (UMBI), University Kebangsaan Malaysia  
25 (UKM), Jalan Yaacob Latiff, Bandar Tun Razak, 56000, Kuala Lumpur, Malaysia

26 <sup>9</sup> Department of Cytokinetics, Institute of Biophysics, Academy of Sciences of the  
27 Czech Republic, Brno, Czech Republic

28 <sup>10</sup> Department of Medical and Biological Sciences, The Catholic University of Korea,  
29 Bucheon, Korea

30  
31 \*These authors contributed equally to this work

32 † authors for correspondence: [jhkim@catholic.ac.kr](mailto:jhkim@catholic.ac.kr) (JK), [koobk@ibs.re.kr](mailto:koobk@ibs.re.kr) (BKK)

33  
34

## Abstract

The mammalian intestine is one of the most rapidly self-renewing tissues, driven by actively cycling stem cells residing at the crypt bottom<sup>1,2</sup>. Together with stromal cells, Paneth cells form a major element of the niche microenvironment that provides various growth factors to orchestrate intestinal stem cell homeostasis, such as Wnt3<sup>3</sup>. With 19 family members, different Wnt ligands can selectively activate  $\beta$ -catenin dependent (canonical) or independent (non-canonical) signaling<sup>4,5</sup>. Here, we report that Dishevelled-associated activator of morphogenesis 1 (Daam1) and its paralogue Daam2 asymmetrically regulate canonical and non-canonical Wnt (Wnt/PCP) signaling, and their function is required for Paneth cell progenitor differentiation. We found that Daam1/2 interacts with the Wnt antagonist Rnf43, and Daam1/2 double knockout stimulates canonical Wnt signaling by preventing Rnf43-dependent endo-lysosomal degradation of the ubiquitinated Wnt receptor, Frizzled (Fzd). Moreover, single-cell RNA sequencing analysis revealed that Paneth cell differentiation is impaired by Daam1/2 depletion, as a result of defective Wnt/PCP signaling. Taken together, we identified Daam1/2 as an unexpected hub molecule coordinating both canonical and non-canonical Wnt signaling, the regulation of which is fundamental for specifying an adequate number of Paneth cells while maintaining intestinal stem cell homeostasis.

## Introduction

The intestinal epithelium provides both a large surface for nutrient uptake as well as a physical barrier against harmful agents such as pathogens, and during homeostasis new cells are rapidly generated to maintain its functionality<sup>1,2</sup>. It is organized in a villus-crypt structure consisting of numerous cell types, including intestinal stem cells (ISCs) and Paneth cells (PCs) at the crypt bottom. Previous studies have shown that multiple signaling pathways are involved in the homeostatic turnover and differentiation of the intestinal epithelium, with Wnt and Notch signaling playing a key role in ISC maintenance and differentiation<sup>1</sup>. The potency of Wnt signaling depends mainly on the cell surface levels of its receptor Fzd, which in turn is controlled by Rnf43 and Znf3 (RZ), transmembrane E3 ligases that ubiquitinate Fzd and promote its degradation through the endo-lysosomal system, thus tightly controlling Wnt signals<sup>6-8</sup>. RZ are in turn regulated negatively by the R-spondin (Rspo) ligand-Lgr4/5 receptor complex<sup>7,9,10</sup>, and positively by phosphorylation of their cytoplasmic tail<sup>11</sup>. In the intestinal epithelium, PCs are the main source of Wnt and Notch ligands<sup>12</sup>. Notch signaling controls cell fate determination of the absorptive and secretory lineages, while canonical Wnt signaling regulates ISC maintenance and proliferation<sup>1</sup>. However, it is still unclear how non-canonical Wnt signaling influences intestinal epithelial homeostasis and differentiation and in which way the non-canonical Wnt signaling is coordinated with canonical Wnt signaling. Here we demonstrate that Daam1 and its paralogue Daam2, members of the diaphanous-related formin (DRF) family of Rho GTPase effectors<sup>13</sup>, function as hub molecules for optimal canonical vs. non-canonical Wnt signaling, to maintain appropriate numbers of ISCs and PCs in the intestinal crypt.

## Results

### Identification of potential Rnf43 interactors

To identify potential functional regulators of Rnf43, we performed mass

85 spectrometry analysis using Rnf43 as bait. From this analysis, we captured a number  
86 of potential interactors, listed in Supplementary Table 1. To functionally test the role of  
87 these candidates in Rnf43 regulation, we performed a small-scale CRISPR/Cas9  
88 knockout screen on mouse small intestinal organoids grown in standard medium  
89 containing Wnt, EGF, Noggin and R-spondin 1 (WENR) (Fig. 1a-f). Guide RNAs were  
90 designed to knock out paralogue genes as well, in order to prevent genetic  
91 compensation caused by functional redundancy<sup>14,15</sup> (Fig. 1c). For this purpose, we first  
92 established a mouse small intestinal organoid line expressing Rnf43-IRES-mCherry  
93 (Dox-Rnf43 SI organoid) under the control of a doxycycline responsive promoter (Fig.  
94 1a, b). As expected, in the presence of doxycycline, these organoids rapidly died as a  
95 consequence of Wnt blockade by overexpressed Rnf43 (Fig. 1b, d). However, genetic  
96 depletion of the putative Rnf43 interactors could prevent organoid death by  
97 maintaining high levels of canonical Wnt signaling, similar to the knockout (KO) of  
98 other negative regulators of Wnt/ $\beta$ -catenin, such as Axin1/2 (Fig. 1b, e and f). Using  
99 this screening platform, we identified Daam1 and Daam2 as functional interactors of  
100 Rnf43 (Fig. 1f, h). Depletion of Daam1/2 (D1/2 DKO) in Dox-Rnf43 organoids could  
101 rescue organoid survival as efficiently as Axin1/2 KO (Axin DKO), despite the presence  
102 of Rnf43 overexpression (Fig. 1f). To test whether Daam1/2 is downstream of the RZ  
103 axis (Lgr4/5-Rspo-RZ), we used withdrawal assays for either R-spondin 1 (EN medium)  
104 or both Wnt and Rspo (EN + the Wnt inhibitor IWP2) (Fig. 1g). As expected, CRISPR-  
105 generated Axin DKO organoids survived in both conditions, whereas RZ DKO  
106 organoids did not survive without Wnt (Fig. 1h and Extended Data Fig. 1). Interestingly,  
107 in contrast to *wild type* (WT) organoids, D1/2 DKO organoids did survive in Rspo  
108 deficient medium (EN), but they also died in the Wnt and Rspo deficient condition  
109 (EN+IWP2) (Fig. 1h). These findings suggest that unlike Axin and Apc, which are  
110 components of the destruction complex downstream of Wnt and Fzd, Daam1/2 acts  
111 downstream of the RZ axis, disruption of which renders organoids independent of  
112 Rspo but still dependent on Wnt stimulation for optimal canonical Wnt signaling.

113

### 114 **Daam1/2 is essential for Rnf43-mediated Fzd endocytosis**

115

116 Next, we sought to understand how Daam1/2 regulates canonical Wnt  
117 signaling in cooperation with Rnf43. Rnf43, as well as its paralogue Znrf3, is a well-  
118 known E3 ubiquitin ligase that targets Fzd for ubiquitination-mediated endo-lysosomal  
119 degradation<sup>6,7</sup>. Hence, we decided to monitor cell surface levels of Fzd in the absence  
120 or presence of Daam1/2. To this aim, we knocked out *Daam1/2* in HEK293T cells (D1/2  
121 DKO HEK293T cells) via CRISPR/Cas9 (Extended Data Fig. 2a, b) and performed  
122 receptor internalization assays using a SNAP-tagged Fzd5 construct (Fig. 2a)<sup>6</sup>. In WT  
123 HEK293T cells, SNAP-Fzd5 was rapidly internalized and decreased from the plasma  
124 membrane when co-expressed with Rnf43. In contrast, D1/2 DKO HEK293T cells  
125 maintained higher levels of cell surface Fzd5. We also assessed the endogenous  
126 levels of cell surface Fzd receptors by flow cytometry analysis using a pan-Fzd  
127 antibody<sup>16</sup>. Even in the presence of Rnf43, D1/2 DKO HEK293T cells showed  
128 increased surface levels of Fzd compared to WT cells, where Fzd levels were  
129 downregulated upon Rnf43 overexpression (Fig. 2b). Moreover, using a cell-surface  
130 protein biotinylation assay, we found that surface levels of the Wnt co-receptor Lrp6  
131 were also retained in the D1/2 DKO HEK293T cells in the presence of Rnf43 (Fig. 2c,  
132 lane 5).

133 To precisely understand the role of Daam1/2 in Rnf43-mediated Fzd  
134 endocytosis, we investigated Rnf43-Daam1/2 interactions and Fzd ubiquitination.

135 Firstly, immunoprecipitation assay using overexpressed full-length (F.L.) tagged  
136 Daam1 and Rnf43 showed that Rnf43 could efficiently pull down myc-tagged Daam1  
137 (Fig. 2d), corroborating our mass spectrometry data (Fig. 1c). Then, to identify which  
138 domain of Daam1 is required for Rnf43 interaction, we overexpressed full-length  
139 Daam1, previously described<sup>17</sup> N-term and C-term truncated constructs, as well as a  
140 Daam1 mutant lacking the C-terminal Dvl-interacting<sup>18</sup> diaphanous autoregulatory  
141 domain (DAD) domain (Fig. 2e), together with Rnf43 in HEK293T cells. We were able  
142 to precipitate Rnf43 together with full-length (F.L.), N-term, and  $\Delta$ DAD mutant Daam1  
143 but not with C-term Daam1 (Fig. 2f), indicating that the Daam1 N-terminal domain is  
144 necessary and sufficient for its interaction with Rnf43. Notably, overexpression of the  
145 N-terminal domain, but not the C-terminal domain, could also rescue Rnf43-mediated  
146 clearance of Lrp6 from the plasma membrane (Fig. 2c, lanes 7 and 8). Only partial  
147 effect was observed with F.L. Daam1 (Fig. 2c, lane 6), in line with previous studies  
148 reporting that Daam proteins, like other formins, stay in a closed, auto-inhibited  
149 conformation<sup>13,17,18</sup>.

150 Next, we checked the effect of D1/2 DKO on Rnf43-mediated Fzd  
151 ubiquitination and degradation. As Dishevelled1/2/3 (Dvl1/2/3) are known to mediate  
152 the interaction between Fzd and Rnf43<sup>19</sup>, we first compared the degradation of Fzd in  
153 D1/2 DKO and Dvl triple KO (TKO) HEK293T cells. In the presence of Rnf43, the  
154 mature form of Fzd was specifically downregulated in WT HEK293T cells (Fig. 2g). In  
155 D1/2 DKO HEK293T cells, the levels of mature Fzd were reduced but not completely  
156 suppressed (Fig. 2g). The same was observed in the Dvl TKO HEK293T cells (Fig.  
157 2g), as expected since Dvl bridges the interaction between Rnf43 and Fzd<sup>19</sup>. This  
158 indicates that Daam1/2, like Dvl, is necessary for Rnf43-mediated degradation of Fzd.

159 However, differences were observed between D1/2 DKO HEK293T and Dvl  
160 TKO HEK293T in the levels of Fzd ubiquitination: in Dvl TKO cells, Fzd ubiquitination  
161 was clearly reduced (Fig. 2h), due to the lack of bridging between Rnf43 and Fzd<sup>19</sup>. In  
162 contrast, D1/2 DKO showed elevated levels of Fzd ubiquitination, even when  
163 compared to that of WT HEK293T cells (Fig. 2h), suggesting that the Fzd ubiquitination  
164 is still intact in D1/2 DKO HEK293T cells. We speculate that Daam1/2 is necessary for  
165 the internalization and subsequent vesicle sorting of ubiquitinated Fzd receptors,  
166 whereas Dvl is important for Rnf43-Fzd interaction and ubiquitination of Fzd. Taken  
167 together, we propose the following stepwise mechanism of ubiquitination-mediated  
168 Fzd endo-lysosomal degradation: first, Dvl promotes the interaction between Rnf43  
169 and Fzd, leading to Fzd ubiquitination, after which Daam1/2 promotes the  
170 internalization and subsequent sorting of ubiquitinated Fzd.

171

## 172 **Daam1/2 deletion confers Rspo independence but fails to phenocopy** 173 **Rnf43/Znrf3 deletion**

174

175 To assess the consequences of Daam1/2 deletion *in vivo* in the mouse  
176 intestine, we generated a Daam1/2 double conditional knockout mouse model (D1/2  
177 cDKO), specifically for the small intestine by using the Villin-CreERT2 (Vil-CreER)  
178 transgenic system (Extended Data Fig. 2c-e). We injected tamoxifen in 6 – 8 weeks  
179 old, age-matched WT, D1/2 cDKO and RZ cDKO mice to ablate Daam1/2 and RZ in  
180 the small intestinal epithelium, respectively. Two weeks after tamoxifen injection, small  
181 intestine sections were examined by Ki67 and lysozyme (Lyz) immunostaining to  
182 detect proliferative progenitor cells and Paneth cells, respectively. As previously  
183 reported, RZ cDKO small intestinal epithelium showed clear hyperplasia with  
184 increased numbers of Ki67+ proliferative cells and Lyz+ Paneth cells (Fig. 3a)<sup>6</sup>.

185 However, D1/2 cDKO epithelium only showed a mild increase of both cell types (Fig.  
186 3a), and there was no clear sign of hyperplasia in any of the examined sections.

187 We next tested whether cells from the newly generated D1/2 cDKO mouse  
188 showed *Rspo* independence, as we observed in *Daam1/2* CRISPR mutants. To this  
189 end, we generated organoids from the small intestine of WT, D12 cDKO, and RZ cDKO  
190 mice after tamoxifen-induced deletion of *Daam1/2* and RZ, respectively. All isolated  
191 organoids with different genotypes grew well in WENR medium. When grown in WEN,  
192 only D1/2 and RZ cDKO organoids survived (Fig. 3b), confirming that D1/2 cDKO  
193 organoids acquired *Rspo* independence, as observed in the original D1/2 DKO  
194 CRISPR mutant organoids (Fig. 1f). Our organoid data also rules out any other defect  
195 in intestinal stem cell maintenance, as D1/2 cDKO organoids could be maintained *in*  
196 *vitro* for multiple passages, as with the other lines. This was also supported by *in situ*  
197 hybridization analysis of intestinal tissue. *Olfm4* and *Axin2* expression patterns clearly  
198 confirmed the presence of intestinal stem cells and canonical Wnt signaling activity,  
199 respectively, in all three genotypes (Fig. 3c). Both D1/2 cDKO and RZ cDKO showed  
200 elevated *Axin2* signals, again confirming higher canonical Wnt activity (Fig. 3c).  
201 However, we noted that *Wnt3*<sup>+</sup> Paneth cells were not increased in D1/2 cDKO, while  
202 Paneth cell hyperplasia was evident in RZ cDKO (Fig. 3c) similar to *Lyz*  
203 immunostaining (Fig. 3a). We conclude that D1/2 cDKO renders intestinal stem cells  
204 more sensitive to Wnt ligand stimulation by compromising RZ-mediated negative  
205 feedback regulation. However, unlike RZ cDKO, D12 cDKO did not show a  
206 concomitant increase in the number of Paneth cells.

207

### 208 **Asymmetric role of *Daam1/2* in non-canonical Wnt pathway for differentiation of** 209 **Paneth cells**

210

211 *Daam1/2* is a well-characterized effector of the non-canonical Wnt/PCP  
212 signaling pathway, working downstream of another Wnt signaling regulator, *Dvl*<sup>17,18</sup>. In  
213 particular, *Daam* proteins were shown to mediate Wnt/PCP-dependent reorganization  
214 of the actin cytoskeleton by activating Rho GTPases, a process required for  
215 gastrulation movements during vertebrate development<sup>17,18</sup>. Recently, it has also been  
216 reported that Paneth cell differentiation involves activation of the Wnt/PCP pathway<sup>20</sup>.  
217 This prompted us to test whether the difference in Paneth cell number between D1/2  
218 and RZ cDKO small intestines was caused by the lack of Wnt/PCP signaling.

219 Hence, we monitored activation of the Wnt/PCP signaling pathway upon  
220 *Wnt5a* stimulation, a well-known non-canonical Wnt ligand, in WT and D1/2 DKO  
221 HEK293T cells. *Dvl* phosphorylation was intact in both WT and D1/2 DKO HEK293T  
222 cell lines, indicating proper Wnt/PCP activation upstream of *Daam1/2* upon *Wnt5a*  
223 treatment (Fig. 4a and Extended Data Fig. 3a). However, downstream signaling events  
224 were compromised as we could not observe any *Wnt5a*-dependent elevation of active  
225 Rho protein level in D1/2 DKO HEK293T cells (Fig. 4a), in agreement with previous  
226 observations<sup>17</sup>. In addition, molecular imaging of F-actin dynamics using Lifeact-GFP  
227 or phalloidin also showed that D1/2 DKO HEK293T cells lack *Wnt5a* stimulation-  
228 dependent cytoskeleton rearrangement and filopodia formation (Fig. 4b and Extended  
229 Data Fig. 3b), a hallmark of Wnt/PCP defect<sup>21-23</sup>. Altogether, these data show that D1/2  
230 KO cells show defects in the Wnt/PCP pathway, in agreement with published work. In  
231 contrast, as shown above, with the lack of negative feedback regulation by *Rnf43*,  
232 canonical Wnt signaling activity was enhanced in the D1/2 DKO HEK293T cells as  
233 they showed a higher level of unphosphorylated active  $\beta$ -catenin level at a steady state  
234 and upon *Wnt3a* stimulation (Fig. 4c). We also confirmed elevated expression of the

235 canonical Wnt signaling target genes, *Sp5* and *Axin2*, by RT-qPCR (Fig. 4d). To test  
236 whether our findings on Wnt/ $\beta$ -catenin modulation by *Daam1/2* could be extended to  
237 other systems, we resorted to the frog model *Xenopus laevis*. During *Xenopus*  
238 development, a Wnt/ $\beta$ -catenin gradient is instrumental in determining the antero-  
239 posterior (AP) body axis, where Wnt activity is lower in the anterior and higher in the  
240 posterior<sup>24</sup>. Because of this, overexpression of Wnt inhibitors in frog embryos causes  
241 enlargement of the head and anterior structures (anteriorization)<sup>25,26</sup>, while Wnt  
242 activation induces head loss (posteriorization)<sup>27</sup>. To test if D1/2 knock-down could  
243 mimic a Wnt activation phenotype, we performed a D1/2 morpholino-mediated knock-  
244 down experiment (Extended Data Fig. 4a-c). When injected into the dorsal  
245 blastomeres of 4-cell stage *Xenopus* embryos (Extended Data Fig. 4d), *Daam1/2*  
246 specific morpholinos synergistically reduced head development compared to WT  
247 controls (Extended Data Fig. 4e-g), phenocopying canonical Wnt overactivation  
248 (Extended Data Fig. 4h).

249 Since *Daam1/2* KO impairs Wnt/PCP signaling (Fig. 4a, b), we checked the  
250 consequence of the Wnt/PCP defect on Paneth cell differentiation using mouse small  
251 intestinal organoids. Lyz immunostaining (Fig. 4e) and UEA1 flow cytometry analysis  
252 (Fig. 4f) showed that the number of Paneth cells was dramatically decreased in D1/2  
253 cDKO organoids, as compared to WT and RZ cDKO organoids. Consistent with *in vivo*  
254 data<sup>6</sup> (Fig. 3a), RZ cDKO organoids showed typical Paneth cell hyperplasia (Fig. 4e,  
255 f). Furthermore, WT intestinal organoids expressing a fluorescent reporter under  
256 regulation of the lysozyme promoter showed a higher number of Paneth cells when  
257 treated with Wnt5a, suggesting that activation of non-canonical Wnt signaling is  
258 sufficient to stimulate Paneth cell differentiation (Fig. 4g). To further confirm the role of  
259 Wnt/PCP signaling in Paneth cell differentiation, we performed single-cell RNA  
260 sequencing analysis of WT, RZ cDKO, and D1/2 cDKO organoids that were cultured  
261 in WENR conditions. In total, we analyzed 8,000 (WT), 13,000 (RZ cDKO), and 9,000  
262 (D1/2 cDKO) cells, and identified 5 main clusters in UMAP (Fig. 5a and Extended Data  
263 Fig. 5a-c). These clusters consisted of revival stem cells, *Lgr5*<sup>+</sup> stem cells, proliferating  
264 cells, enterocytes, and mature secretory lineage cells. Due to the use of high canonical  
265 Wnt stimulation in organoid culture medium, progenitor cell populations were highly  
266 represented; this is a favorable condition that allowed us to gain insights into the initial  
267 commitment to different cell lineages of the progenitor cell populations. The number of  
268 *Lgr5*<sup>+</sup> cells was comparable among all three genotypes with a small decrease  
269 observed in D1/2 cDKO organoids, which was compensated by a concomitant  
270 increase in the fraction of revival stem cells (Fig. 5b). In D1/2 cDKO organoids, the  
271 most significantly affected populations were the mature secretory cell types (Fig. 5b).  
272 Likewise, *Neurog3*<sup>+</sup> and *Tff3*<sup>+</sup> secretory lineage progenitor cells (Fig. 5c) were missing  
273 in D1/2 cDKO organoids. Interestingly, *Dll1*<sup>+</sup> early secretory progenitors were still  
274 present in D1/2 cDKO organoids (Fig. 5c), suggesting that the first binary commitment  
275 to the secretory lineage by Notch signaling is not affected by *Daam1/2* KO. We also  
276 observed decreased levels of *Ctca3b* and *Cfap126* (*Flattop*, a known Wnt/PCP target  
277 gene<sup>20,28</sup>) (Fig. 5c, d), as well as of the Paneth cell markers *Defa24* and *Defa17* (Fig.  
278 5c). Most interestingly, the number of *Dclk1*<sup>+</sup> tuft cells was significantly increased in  
279 the D1/2 cDKO organoids (Fig. 5c), probably as a result of the block towards other  
280 secretory lineages among committed *Dll1*<sup>+</sup> cells. These results were also confirmed  
281 through pseudobulk RNA-seq analysis, as shown in Extended Data Fig. 6a-g. These  
282 data provide the first genetic evidence that Wnt/PCP is involved in secretory lineage  
283 specification, particularly Paneth cell differentiation, as predicted by previous work<sup>20</sup>.  
284 In agreement with the data presented here and from others<sup>20</sup>, we propose the following

285 stepwise binary fate decision model for intestinal cell specification: first Notch signaling  
286 directs the choice between absorptive and secretory (*Dll1+*) lineages; then Wnt/PCP  
287 signaling regulates differentiation between tuft and other secretory lineages (Fig. 5e).

288 Finally, our analysis of the differentiation pattern of D1/2 cDKO intestinal  
289 epithelial cells provides a clear explanation for why we did not observe a similar Paneth  
290 cell hyperplasia as observed in the RZ cDKO intestine (Fig 3a). We previously showed  
291 that introducing *Math1* or *Wnt3* cKO, which prevents Paneth cell formation, into an RZ  
292 cDKO genetic background produced a strongly alleviated phenotype, despite  
293 maintaining *Rspo* independence and Wnt hypersensitivity<sup>29</sup>. D1/2 cDKO leads to the  
294 same alleviated phenotype by the unexpected combination of *Rspo* independence and  
295 Paneth cell defects, caused by the asymmetric regulation of canonical (up) and non-  
296 canonical (down) Wnt signaling by *Daam1/2* KO.

297

298

## 299 Discussion

300

301 Using cell cultures, organoids and mouse models, we have demonstrated that  
302 *Daam1* and *Daam2* are novel downstream regulators of RZ in the small intestine,  
303 which mediate endocytosis of ubiquitinated Fzd. A similar endocytic function for  
304 *Daam1* has been previously reported and shown to be important for ephrinB signaling  
305 in the zebrafish notochord<sup>30</sup>. Of note, interaction with ephrinB occurred via the N-  
306 terminal domain of *Daam*<sup>30</sup>, analogous to the *Rnf43*-*Daam1* interaction uncovered  
307 here. Similarly, *Daam* was shown to interact through its N-terminal domain with  $\beta$ -  
308 arrestin2, a protein regulating endocytosis and Wnt/PCP signaling during *Xenopus*  
309 convergent extension<sup>31</sup>. We thus speculate that our work uncovers a more general  
310 role for *Daam* proteins in cell signaling regulation via endocytosis, a fundamental  
311 process in Wnt signaling<sup>5,32</sup>, perhaps shared by other members of the Formin  
312 superfamily<sup>33</sup>.

313 We have also confirmed that *Daam1/2* plays an important role in the non-  
314 canonical Wnt pathway as a downstream effector of Dvl. Hence, loss of *Daam1/2*  
315 enhances canonical Wnt signaling, while reducing Wnt/PCP signaling. In contrast, RZ  
316 negatively regulate both canonical and non-canonical Wnt, by targeting canonical Wnt  
317 receptors Fzd and *Lrp6*<sup>6,7</sup>, as well as non-canonical Wnt components *Ror1/2* and  
318 *Vangl1/2*<sup>34</sup> for degradation, such that its loss causes enhanced signaling in both  
319 pathways<sup>35,36</sup>. Due to this difference, RZ cDKO intestine showed hyperplasia with  
320 over-production of Paneth cells, whereas D1/2 cDKO intestine displayed an alleviated  
321 phenotype, characterized by a lack of efficient Paneth cell specification. Our data  
322 unveil an unexpected additional binary fate decision step regulated by Wnt/PCP  
323 signaling, after the well-known primary fate decision between absorptive and secretory  
324 lineages regulated by Notch signaling<sup>1</sup>. This Wnt/PCP-regulated fate determination  
325 step seems to govern secretory cell differentiation between tuft cells and other  
326 secretory cell types, including Paneth cells (Fig. 5e). In D1/2 cDKO intestine and  
327 organoids, secretory lineage differentiation is heavily compromised, particularly at the  
328 expense of Paneth cells, while increasing the production of tuft cells, which are usually  
329 the rarest population in the gut epithelium.

330 Paneth cells represent a key epithelial cell population that provides  
331 neighboring stem cells with essential niche factors, especially *Wnt3*. Such epithelial  
332 Wnt-producing cells can be an important pro-tumorigenic niche for tumorigenic stem  
333 cells that are still dependent on Wnt ligands for their maintenance and growth (e.g.,  
334 RZ mutants or *Rspo*-fusion bearing mutants). Paneth cell hyperplasia in RZ tumors is

335 known to create a positive feedback loop that sustains Wnt-addicted tumor cells via  
336 the massive production of Wnt-secreting cells<sup>29</sup> (Fig. 4h). For this reason, porcupine  
337 inhibitors have received particular attention as they can be used to inhibit Wnt  
338 secretion from the tumorigenic niche<sup>29</sup>. Our data suggest another vulnerable point,  
339 since inhibiting non-canonical Wnt signaling can have a similar effect by altering the  
340 secretory lineage specification. In conclusion, our study not only provides genetic  
341 evidence for a role of Wnt/PCP signaling in intestinal secretory lineage specification,  
342 but also opens up new therapeutic avenues to treat Wnt-addicted cancers.

343

#### 344 **Author contribution**

345 G.C., A.M., J.K. and B.K. conceived and designed the study. G.C., A.M., S.W., A.C.B.,  
346 T.W.R., I.J., J.H.L., A.D.B., F.F., T.Y.L. and J.K. performed the experiments. G.C., A.M.,  
347 S.W., T.W.R., I.J., T.Y.L., M.M.M., V.B., J.K. and B.K. analyzed the results and H.L.  
348 analyzed the scRNA-seq data. T.W.R. and V.B. provided material required for this  
349 study. G.C., H.L., J.K. and B.K. wrote the manuscript. All authors read and provided  
350 comments on the manuscript.

351

#### 352 **Acknowledgements**

353 We thank members of the Koo, Elling, and Urban labs for valuable discussions and  
354 critical comments, Dr. Rike Zietlow for reading and editing the manuscript, VBC core  
355 facilities (especially the Histology Facility, which performed RNA-Scope stainings,  
356 BioOptics, Molecular Biology and the animal caretakers), and the lab of Dr. Elly Tanaka  
357 for providing the frog embryos. Single-cell RNA-seq was performed by the Next  
358 Generation Sequencing Facility at Vienna BioCenter Core Facilities (VBCF), member  
359 of the Vienna BioCenter (VBC), Austria. Work in the Koo lab is supported by core  
360 funding from the Institute of Molecular Biotechnology (IMBA) of the Austrian Academy  
361 of Sciences; ERC starting grant, Troy Stem cells, 639050; Interpark Bio-Convergence  
362 Center Grant Program. G.C. is supported by the Austrian Science Fund (FWF), Lise  
363 Meitner Program M 2976. S.W. is supported by DOC Fellowship of the Austrian  
364 Academy of Sciences. Research in V.B. lab is funded by the Czech Science  
365 Foundation (GX19-28347X). This work is dedicated to the memory of Maurizio  
366 Colozza (1950-2021).

367



## 368 **Methods**

369

### 370 **Mouse husbandry and generation of conditional knockouts**

371 Daam1tm1a(EUCOMM)Hmgu and Daam2tm1a(KOMP)Wtsi chimeras were  
372 generated by blastocyst microinjection. Chimeras were crossed with the Villin-  
373 CreERT2 (Vil-CreERT2) mouse line to generate the conditional Vil-CreERT2-  
374 Daam1fl/fl, Vil-CreERT2-Daam2fl/fl, and Vil-CreERT2-Daam1fl/fl-Daam2fl/fl lines. The  
375 Vil-CreERT2-Rnf43fl/fl-Znrf3fl/fl mouse line was included as a positive control. To  
376 induce Cre recombinase, 2 mg of tamoxifen in corn oil per 20 g of body weight or corn  
377 oil alone for negative control animals were injected at age 8 – 12 weeks. Both male  
378 and female mice were included in the experiments. Small intestine crypts were isolated,  
379 and organoids were established for further *in vitro* experiments, as described below.  
380 All mice were sacrificed two weeks after Cre induction. Standard light/dark cycle,  
381 temperature, and humidity parameters were used by the mouse facility to maintain all  
382 mouse lines. All animal experiments adhered to the guidelines of the Austrian Animal  
383 Care and Use Committee.

384

### 385 **Small intestine organoid establishment and maintenance**

386 Small intestinal crypt isolation and organoid establishment were reported previously  
387 <sup>6,29</sup>. Briefly, mouse small intestinal crypts were isolated by applying Gentle Cell  
388 Dissociation Reagent from STEMCELL technologies at room temperature for 20 min.  
389 About 100 – 150 isolated crypts per well were seeded in Matrigel with ENR (Egf,  
390 Noggin and R-Spondin1) or WENR (Wnt3a-containing ENR) + Nicotinamide  
391 (WENR+Nic) culture medium composed of advanced Dulbecco's modified Eagle  
392 medium (DMEM)/F12 supplemented with penicillin/streptomycin, 10 mM HEPES  
393 (Gibco), GlutaMAX (Gibco), 1x B27 (Life Technologies), 10 mM nicotinamide  
394 (MilliporeSigma; used only in WENR), 1.25 mM N-acetylcysteine (Sigma-Aldrich), 50  
395 ng/ml mEGF (PeproTech), 100 ng/ml mNoggin (PeproTech), 10% R-spondin1  
396 conditioned medium, 50% Wnt3A conditioned medium (only in WENR), and 10 mM  
397 ROCK inhibitor (Tocris). Established organoids were routinely passaged at a 1:3 – 1:5  
398 ratio every week and maintained in culture medium without ROCK inhibitor.

399

### 400 **Organoid single-cell analysis**

401 To induce gene recombination in Vil-CreERT2 Daam1/2 double conditional knockout  
402 (D1/2 cDKO) and Vil-CreERT2 Rnf43-Znrf3 double conditional knockout (RZ cDKO)  
403 small intestinal organoid lines, 1 µg/ml 4-hydroxytamoxifen (4-OHT) was added  
404 overnight in WENR+Nic (Wnt, Egf, Noggin, R-spondin1 + nicotinamide) organoid  
405 culture medium. After recombination, D1/2 and RZ mutant organoids were cultured in  
406 WEN+Nic medium for selection purposes, as only successfully recombined mutant  
407 cells survive in the absence of Rspo1. WT, D1/2 cDKO and RZ cDKO organoids were  
408 maintained in regular WENR+Nic (WT) or WEN+Nic (D1/2 and RZ cDKO) culture  
409 medium for 10 days prior to single-cell analysis. Three days prior to single-cell analysis,  
410 organoids were passaged at a 1:3 ratio. For analysis, organoids were mechanically  
411 and chemically dissociated and prepared for library generation and sequencing by  
412 Vienna BioCenter Next Generation Sequencing Facility. WT (8,000), RZ cDKO  
413 (13,000), and D1/2 cDKO (9,000) cells were analyzed and obtained sequencing data  
414 were processed as described below.

415

416

### 417 **scRNA-seq data preprocessing**

418 To generate count matrices for each organoid sample such as wildtype ('WT\_WENR'),  
419 Rnf43/Znrf3 double knock-out (RZ\_WEN), and Daam1/Daam2 double knock-out  
420 (Daam\_WEN), Cellranger (v6.1.1)<sup>37</sup> was utilized with default option and mouse  
421 reference ('refdata-gex-mm10-2020-A') provided in 10X genomics. Based on Seurat  
422 pipeline (v4.1.0)<sup>38</sup>, we generated analytic objects from each gene-by-cell matrix from  
423 'filtered\_feature\_bc\_matrix' of cellranger, we firstly filtered-out poor-quality cells with  
424 less than 4,000 and more than 40,000 unique molecular identifiers (UMIs), more than  
425 13% percent mitochondrial genes, and more than 4,000 detected genes for  
426 WT\_WENR and RZ\_WEN samples. Especially for Daam\_WEN sample, we applied  
427 partially different criteria to discard poor-quality cells with more than 50,000 UMIs and  
428 more than 5,000 detected genes. After quality control step, we had 3,828 cells  
429 (WT\_WENR), 4,342 cells (RZ\_WEN), and 3,257 cells (Daam\_WEN). Then, we  
430 sequentially conducted NormalizeData (log-normalization) and FindVariableFeatures  
431 ('vst' method, 2,000 features) functions of Seurat pipeline for each sample. In order to  
432 select singlet, DoubletFinder\_v3, which is a recent version of DoubletFinder<sup>39</sup>, was  
433 conducted with default parameters. Using cell cycle markers derived from  
434 AnnotationHub R package (v3.4.0) with 'Mus musculus', 'EnsDb' for S and G2/M  
435 phases, we calculated cell cycle scores via CellCycleScoring function and regressed  
436 out based on the scores such as 'S.Score' and 'G2M.Score' on Seurat pipeline. After  
437 merging three count objects and storing each object to sample category, we performed  
438 PCA with RunPCA function to prepare harmonization which is one of batch reduction  
439 methods. The merged object was harmonized through RunHarmony function with  
440 'Sample' as biological factor and 30 PCs<sup>40</sup>. Based on the dimensionally reduced object,  
441 we identified clusters through the sequential procedures such as RunUMAP,  
442 FindNeighbors ('k.param' is 25), and FindClusters ('resolution' is 0.75, Louvain  
443 algorithm) with 30 harmony PCs.

444

#### 445 **scRNA-seq data analysis**

446 In order to annotate cell types in the dataset, we used cell type markers described in  
447 Extended Data Fig. 5. Using expression profile of clusters, the clusters have been  
448 combined to reflect that intestinal organoids cultured in conventional media consist of  
449 a large proportion of stem cells and a small proportion of fully differentiated cells<sup>41</sup>.  
450 Because genetic change may affect to cell homeostasis and transcriptomic changes  
451 of cell type markers, we annotated cell types based on gene expression in WT\_WENR.  
452 In order to generate dot plots for each sample origin, expression patterns of each gene  
453 within cells corresponding to sample and cluster instance were used. Using  
454 dittoBarPlot function in dittoSeq R package (v1.6.0)<sup>42</sup>, we generated cell type  
455 proportion in each sample. The statistical significances for the difference of a cell type  
456 between samples were estimated through Fisher's exact test. We showed expression  
457 pattern of each gene on UMAP clusters for combined samples and individual samples  
458 based on UMAP coordinates and expression level.

459

#### 460 **Pseudo-bulk RNA-seq analysis**

461 From single cell RNA-seq data, aggregation of UMI counts from group of cells has  
462 been used to observe differential gene expressions across clusters or sample-wise. In  
463 order to capture global effect of genetic differences in transcriptome, we adopted  
464 pseudo-bulk approach with 10 pseudo-samples from each of scRNA-seq count  
465 matrices with QC passed cells according to WT\_WENR, RZ\_WEN, and Daam\_WEN  
466 samples. Each sample has a gene-by-pseudo-sample count matrix and each column  
467 (i.e., a pseudo-sample) contains the aggregated UMI counts for the corresponding

468 genes from same number of randomly selected cells. We employed DESeq2<sup>43</sup> R  
469 package to normalize UMI counts. For each gene, we compared log-scaled  
470 normalized expression levels from samples and estimated statistical significance with  
471 Mann-Whitney U test and Kruskal-Wallis test by using 'stat\_compar\_means' function  
472 on 'ggpubr' R package (v0.4.0).

473

### 474 **Organoid electroporation**

475 Small intestinal organoids were electroporated following a previously established  
476 protocol<sup>15</sup>. Two days before electroporation, culture medium was replaced from  
477 WENR+Nic to EN+Nic in the presence of ROCK inhibitor and the Gsk3 inhibitor  
478 CHIRON 99021. One day before electroporation, 1.25% v/v DMSO was added to the  
479 culture medium. On the day of electroporation, organoids were dissociated into small  
480 clusters by TrypLE treatment and electroporation was performed in 400 µl of BTXpress  
481 buffer (Havard Apparatus) with 12.5 µg of DNA using a NEPA21 Electroporator (NEPA  
482 Gene). For CRISPR/Cas9 mediated knockout, organoids were electroporated with  
483 CRISPR-concatamer vectors containing gene-specific guide RNAs (gRNAs) in  
484 combination with a Cas9 expression plasmid (Addgene #41815), at a 1:1 ratio. The  
485 electroporated organoids were seeded in Matrigel and cultured with EN medium in the  
486 presence of Nic and ROCK inhibitor. Two days later, post-electroporation culture  
487 medium was replaced by regular culture medium (ENR or WENR). DNA oligos and  
488 primers used to generate and analyze CRISPR KO organoids are listed in Table 1.

489

### 490 **Generation of a Paneth cell reporter SI organoid line**

491 SI organoids expressing tamoxifen-inducible Cas9 were established from Vil-CreERT2;  
492 Rosa26 - floxed STOP - Cas9 mice. These organoids were co-electroporated with a  
493 plasmid containing *Lysozyme 1* (*Lyz1*) sgRNA for *Lyz1* and a Golden Gate-generated  
494 targeting vector containing the coding sequence of *2A-peptide-mRuby* red fluorescent  
495 protein, followed by a PGK-driven blasticidin resistance gene and flanked by homology  
496 arms (HA) of 48 bp of length, that are homologous to the region immediately up- and  
497 downstream of the *Lyz1* stop codon. After electroporation, organoids were selected  
498 with 100 µg/ml blasticidin for 6-7 days. Hence, single surviving organoids were  
499 manually isolated to generate monoclonal lines and genotyped to confirm the correct  
500 integration of *mRuby* in *Lyz1*. For Wnt5a treatment, *Lyz1::Ruby* organoids were  
501 seeded in ENR, WENR or W5aENR, where recombinant Wnt5a protein (rWnt5a, R&D  
502 Systems) is added to ENR at a final concentration of 200 ng/ml. Organoids were  
503 cultured for 5 days before imaging analysis. Media were refreshed every 2 days.

504

### 505 **Immunohistochemistry and RNA-Scope *in situ* hybridization**

506 All immunohistochemical (IHC) staining experiments on mouse intestinal sections  
507 were performed by the IMBA Histology Facility at Vienna BioCenter Core Facilities  
508 (VBCF), member of the Vienna BioCenter (VBC), Austria. All samples were incubated  
509 in 3% H<sub>2</sub>O<sub>2</sub> in blocking solution [2% BSA, 5% goat serum, 0.3% Triton-X100 in PBS  
510 (phosphate buffered saline, 137 mM NaCl, 2.7 mM KCl, 10 mM Na<sub>2</sub>HPO<sub>4</sub>, 1.8 mM  
511 KH<sub>2</sub>PO<sub>4</sub>, pH 7.4)] at room temperature (RT) for 10 min and further incubated in  
512 blocking solution at RT for 1 hour. Sections were incubated overnight with primary  
513 antibodies diluted in blocking solution, followed by 3 washes in PBS and incubation  
514 with secondary antibody solution for 1 hour at RT. After 3 additional washes in PBS,  
515 sections were processed for Hematoxylin/Eosin (H&E) staining, which was performed  
516 without heat using the EpreDia Gemini AS Automated Slide Stainer, and finally  
517 mounted. For RNAScope/IHC protocol, 4 µm thick sections were processed using the

518 RNAscope® Multiplex Fluorescent Detection Kit (ACDBio), following manufacturer's  
519 directions. Finally, stained slides were mounted with fluorescence mounting medium  
520 (Dako).

521

### 522 **Generation of DAAM1 and PiggyBac RNF43 expression vectors**

523 Human *DAAM1* cDNA was purchased from TransOMIC. Full length or truncated  
524 *DAAM1* constructs were PCR-amplified using Phusion High Fidelity Polymerase (NEB)  
525 and cloned into pCDNA4/TO or pCS2 expression vectors, containing a Myc Tag for C-  
526 terminal fusion. In order to generate pBhCMV-hRNF43-IRES-mCherry and pPB-CAG-  
527 rtTA\_Hyg, cDNAs of human RNF43 and hygromycin resistance were PCR-amplified  
528 as mentioned above and cloned into PiggyBac-based vectors containing tet-  
529 responsive elements, using the In-Fusion HD cloning kit (Clontech), according to  
530 manufacturer's instructions. RNF43 and rtTA expression constructs were  
531 electroporated into SI organoids as described above, always in combination with the  
532 Super PiggyBac Transposase expression vector in a 2:2:1 ratio. All constructs reported  
533 here were sequence-verified using Sanger sequencing.

534

### 535 **Cell culture, DNA transfection and growth factor stimulation**

536 HEK293T cells were maintained in DMEM supplemented with 10% FBS, 1% glutamine  
537 and 1% penicillin-streptomycin, kept in a 37 °C and 5% CO<sub>2</sub> incubator and passaged  
538 every 5 – 7 days. Transfection was performed by using 1 µg/ml polyethylene imine  
539 (PEI), pH 7.4, and plasmid DNA at a 5:1 ratio<sup>44</sup>. Plasmid DNA used was 5 µg per 6 cm  
540 culture dish (ubiquitination and Fzd degradation assays) or 10 µg per 10 cm dish (co-  
541 immunoprecipitation experiments). For Fzd degradation and ubiquitination analysis,  
542 Rnf43 was transfected at a ratio of 1:5 to total plasmid DNA. For Wnt3a treatment (as  
543 shown in Fig. 4c and d), HEK293T cells were plated on 12-well plates, and upon  
544 reaching 80% confluency cells were treated with Wnt3a-conditioned medium (CM),  
545 overnight for real time-quantitative PCR or for the time indicated in the case of active  
546 β-catenin immunoblot. For the experiment shown in Extended Data Fig. 3a,  
547 endogenous Wnt ligand secretion was inhibited by overnight treatment with 1 µM LGK-  
548 974 (PeproTech). Subsequently, the non-canonical Wnt pathway was activated by  
549 adding rWnt5A (R&D Systems) to the culture medium at 40 or 80 ng/ml final  
550 concentration, with or without 50 ng/ml of recombinant human R-Spondin-1  
551 (PeproTech). For Wnt5a-induced actin cytoskeleton rearrangements, untransfected  
552 HEK293T cells or cells transfected 48 hours earlier with pEGFP-C1 Lifeact-EGFP  
553 (Addgene, plasmid #58470) were treated with Wnt5a CM or protein (200 ng/ml) for 2  
554 hours at 37 °C, before fixation and immunostaining. Wnt5a CM was produced from  
555 commercially available L-cells (ATCC, CRL-2814), while Wnt3a CM was produced  
556 from L-cells kindly provided by Hans Clevers (Hubrecht Institute, Utrecht, Netherlands),  
557 following standard protocols. WT L-cells (ATCC, CRL-2648) were instead used to  
558 produce control CM.

559

### 560 **HEK293T Daam1/2 DKO clone generation**

561 To generate Daam1/2 DKO clones, CRISPR/Cas9 mediated knockout was performed  
562 as follows. WT HEK293T cells were seeded 3 days before transfection and a  
563 concatemer construct harboring Daam1 and Daam2 sgRNAs and Cas9-expressing  
564 vector were co-transfected, together with GFP. Successfully transfected HEK293T cells  
565 were sorted by FACS and seeded as single cells to confirm genotype of Daam1 and  
566 Daam2 by Sanger sequencing followed by TIDE analysis for the quantitative  
567 assessment of CRISPR gene editing. DNA oligos and primers used are listed in Table

568 1.

569

### 570 **Immunofluorescence and confocal imaging**

571 Whole mount immunostaining on organoids was performed following the protocol  
572 described by van Ineveld et al.<sup>45</sup>, with no modifications. For HEK293T  
573 immunofluorescence, cells were grown on 12-well plates containing glass coverslips,  
574 pre-coated with a solution containing 0.01% poly-L-Ornithine (Millipore) overnight at  
575 37°C. Cells were then transfected and/or stimulated as described above, followed by  
576 two washes with PBS, fixation in 4% (wt/vol) paraformaldehyde (PFA) in PBS for 20  
577 min, then permeabilization with 0.2% (vol/vol) Triton X-100 in PBS. Coverslips were  
578 then washed with PBS, blocked for 1 hour in blocking buffer consisting of 3% (wt/vol)  
579 BSA in PBS at room temperature, and incubated with primary antibodies in blocking  
580 buffer overnight at 4°C. The next day cells were washed 3 times with PBS, incubated  
581 with secondary antibodies diluted in blocking buffer for 1 hour at room temperature  
582 and mounted onto glass slides with ProLong Gold antifade reagent with DAPI (Life  
583 Technologies) to stain cell nuclei. A list of primary and secondary antibodies used in  
584 this study, including their dilution, is provided in Table 2. Cells and organoids were  
585 imaged using an inverted LSM 880 Airyscan confocal microscope (Carl Zeiss, Jena,  
586 Germany) using 405-, 488- and 561-nm lasers for excitation, and a 20× objective (Plan  
587 Apochromat × 20/0.8). Z-stacks were acquired with a resolution of 1024 pixels, snaps  
588 with resolution of 2048 (frame size 2048x2048). For scanning, the following  
589 parameters were used: unidirectional scanning, averaging number 8, 8 bit depth.  
590 Images were acquired with multi-tracking for each fluorophore and Zeiss ZEN Black  
591 Edition software. ZEN Blue Edition software was used for image analysis. The list of  
592 antibodies and fluorophores used for immunostaining throughout this paper is  
593 provided in Table 2.

594

### 595 **Surface Fzd5 internalization assay**

596 SNAP-tagged Frizzled5 (SNAP-Fzd5) subcellular localization was monitored in wild  
597 type and Daam1/2 KO HEK293T cells in the presence and absence of Rnf43 co-  
598 expression, as previously described<sup>6</sup>. SNAP-surface-Alexa549 (NEB) was applied to  
599 label surface SNAP-Fzd5 for 15 min at RT in the dark, following manufacturer's  
600 instructions. The labelled Fzd5 was chased for 30 min, after which, cells were fixed  
601 and processed for confocal imaging as described above.

602

### 603 **Cell surface biotin labeling**

604 Cell surface biotinylation was performed as previously described<sup>26</sup>. Briefly, HEK293T  
605 cells were grown on 6-well plates previously coated overnight with a 0.1 mg/ml solution  
606 of poly-L-ornithine (Millipore), an important requirement to prevent cell detachment. 48  
607 hours after transfection with the DNA constructs indicated in Fig. 2c, cells were  
608 transferred on ice and washed twice with ice-cold phosphate-buffered saline (PBS).  
609 Cell surface proteins were then biotinylated by incubation with 1 mg/ml of the cell  
610 membrane-impermeable reagent EZ-Link Sulfo-NHS-SS-Biotin (ThermoFisher)  
611 dissolved in PBS for 30 minutes at 4 °C with gentle agitation. Cells were washed three  
612 times with ice-cold quenching solution (50 mM glycine in PBS, pH 7.4), and twice with  
613 ice-cold PBS. Cells were kept on ice for the entire length of the labeling protocol. After  
614 the final wash, cells were lysed directly on the plates with 300 µl TNE lysis buffer (Tris-  
615 NaCl-EDTA, 50 mM Tris HCl, pH 7.4, 150 mM NaCl, 1 mM EDTA, 1% Nonidet P-40)  
616 supplemented with protease inhibitors (Roche). Cell lysates were spun at 13,000 rpm  
617 at 4 °C on a table-top centrifuge to remove cell debris, and then incubated with

618 streptavidin-agarose magnetic beads (ThermoFisher) for 3 h at 4 °C using a head-  
619 over-head rotator to bind biotinylated proteins. An aliquot of the original cell lysate was  
620 saved for input control. At the end of the pull-down, beads were extensively washed  
621 with TNE buffer at 4 °C with rotation, and then heated to 95 °C in the presence of 2x  
622 Laemmli buffer (BioRad) to elute proteins, followed by SDS-PAGE/Western blot  
623 analysis. To assess pull-down specificity, a no-biotin control sample was included, and  
624 endogenous transferrin receptor (TfR) was monitored as a negative control.

625

### 626 **Immunoprecipitation**

627 To assess Rnf43 and Daam1 interaction, we performed immunoprecipitation (IP)  
628 assays as previously described<sup>46</sup>, with some modifications. Briefly, HEK293T cells  
629 seeded onto 10-cm plates were transfected with the constructs indicated in Fig. 2d-f,  
630 using PEI and 10 µg total DNA. 48 hours after transfection, cells were lysed in 1 ml IP  
631 lysis buffer (10 mM Tris-HCl, pH 7.5, 100 mM NaCl, 2 mM EDTA, 1 mM EGTA, 0.5%  
632 (v/v) NP-40, 10% (v/v) glycerol) supplemented with protease inhibitor cocktail  
633 (cOmplete, EDTA-free, Roche). Cell lysates were clarified by centrifugation (13,000  
634 rpm, 4 °C) and then pre-cleared with 20 µl of protein A/G PLUS agarose beads (sc-  
635 2003, Santa Cruz Biotechnology) for 1 hour at 4 °C, on a head-over-head rotator.  
636 Beads were removed by centrifugation and cleared lysates were then incubated with  
637 2 µg of primary antibody (anti-HA, ThermoFisher) overnight at 4°C on a head-over-  
638 head rotator. Supernatants were then incubated with 40 µl of protein A/G agarose  
639 beads for 2 hours at 4 °C on rotation, extensively washed in lysis buffer, resuspended  
640 in 40 µl of SDS 2x Laemmlibuffer (BioRad) and heated for 5 minutes at 95 °C to elute  
641 immunocomplexes, followed by analysis through SDS PAGE and Western Blot. For  
642 IP/mass spectrometry (IP/MS) to identify Rnf43 interactors, Rnf43-2xFlag-2xHA was  
643 pulled-down with anti-Flag agarose beads (Sigma). A total of 5 independent  
644 experiments were included in this assay, and a Rnf43 deletion construct containing  
645 only the extracellular protease-associated and transmembrane domains (PA/TM  
646 Rnf43) was used to assess for interaction specificity. MS on immunisolated  
647 complexes was conducted as previously described<sup>6</sup>. The hit list containing all identified  
648 peptides and their relative abundance is provided in Supplementary Table 1.

649

### 650 **Ubiquitination assay**

651 HEK293T cells seeded in 6-cm plates and maintained in DMEM with 10% FBS and  
652 penicillin-streptomycin were transfected with ubiquitin-Myc-6xHis, V5-Frizzled5 and  
653 Rnf43-2xFlag-2xHA using PEI. Where required, transfected cells were incubated with  
654 10 nM Bafilomycin A1 (BafA1) overnight before lysis. Two days after transfection,  
655 samples were harvested and lysed with 500 µl IP lysis buffer (as described above)  
656 supplemented with protease inhibitor cocktail (cOmplete, EDTA-free, Roche) and 10  
657 mM N-Ethylmaleimide (NEM, Sigma-Aldrich, E3876). Lysates were then incubated  
658 with V5-Trap magnetic agarose beads (ChromoTek) overnight at 4 °C before being  
659 processed for Western Blot analysis.

660

### 661 **Wnt5a-induced active Rho assay**

662 Active Rho pull-down was performed as previously described<sup>47</sup>, with some  
663 modifications. HEK293T cells were stimulated with rWnt5a at a concentration of 200  
664 or 400 ng/ml for 30 minutes at 37 °C. Next, cells were quickly washed with ice-cold  
665 PBS and lysed in ice-cold lysis buffer (25 mM Tris•HCl, pH 7.2, 150 mM NaCl, 5 mM  
666 MgCl<sub>2</sub>, 1% NP-40 and 5% glycerol). Crude lysates were then clarified by centrifugation  
667 and the supernatant was incubated with glutathione magnetic beads (ThermoFisher),

668 conjugated with the Rhotekin Rho Binding domain (RBD)-GST fusion protein  
669 (produced from Addgene plasmid #15247), for 1 hour at 4 °C, before proceeding to  
670 Western blot analysis.

671

## 672 **Western Blotting**

673 SDS-PAGE and Western blots were performed using pre-cast gradient gels  
674 (ThermoFisher), using standard protocols. Blotted nitrocellulose membranes were  
675 analyzed using the Li-Cor software Odyssey 3.0. All primary and secondary antibodies  
676 were diluted either in Tris-buffered saline plus 0.1% Tween 20 (TBST) containing 2.5%  
677 (wt/vol) of Blotting Grade Blocker (Bio-Rad), or in LiCor Intercept (TBS) blocking buffer  
678 supplemented with 0.1% Tween 20. The list of antibodies used and their dilution is  
679 provided in Table 3.

680

## 681 ***Xenopus* husbandry and embryo injection**

682 Wildtype frogs were obtained from the European *Xenopus* Resource Center (EXRC),  
683 UK and NASCO, USA, and group-housed at the Institute of Molecular Pathology (IMP)  
684 facilities. All animal handling and surgical procedures were carried out adhering to the  
685 guidelines of the Austrian Animal Care and Use Committee. *In vitro* fertilization was  
686 performed as previously described<sup>48</sup>. Briefly, testes were surgically removed from a  
687 male frog anesthetized in 0.03% tricaine methanesulfonate (MS222, Sigma-Aldrich),  
688 and a sperm suspension was obtained by crushing each testis in 1 ml of 1x Marc's  
689 Modified Ringers (MMR, 0.1 M NaCl, 2.0 mM KCl, 1 mM MgSO<sub>4</sub>, 2 mM CaCl<sub>2</sub>, 5 mM  
690 HEPES, pH 7.4). Ovulation of female frogs was induced the night before the  
691 experiment by injecting 500 IU of human chorionic gonadotropin (hCG). On the day of  
692 the experiment, frogs were allowed to spontaneously lay eggs in a high-salt solution  
693 (1.2x MMR). Laid eggs were collected and fertilized with 200–300 µl of the sperm  
694 suspension. To remove the jelly coat, fertilized eggs were treated with 2% cysteine in  
695 0.1x MMR, pH 7.8, for about 7 min at RT. Dejellied embryos were then cultured in 0.1x  
696 Marc's modified Ringer's solution and staged according to Nieuwkoop and Faber<sup>49</sup>.  
697 Translation-inhibiting Morpholino (MO) antisense oligos specific for *Xenopus daam1*  
698 and *daam2* were obtained from GeneTools. The *daam1* MO sequence was previously  
699 reported<sup>50</sup>, while *daam2* MO was designed *ex novo* for this study. *Xenopus* genomic  
700 sequence deposited at Xenbase was used to verify that the designed *daam* MOs  
701 target both L and S homeologs<sup>51</sup>. All morpholino sequences used in this study are  
702 listed in Table 1. For embryo injections, 30 ng total/embryo of *daam1/2* MOs were  
703 injected alone or in combination into the 2 dorsal blastomeres of 4-cell stage embryos.  
704 Standard Morpholino (CoMO, targeting a human beta-globin intron mutation that  
705 causes beta-thalassemia) was used as a negative control and injected at a similar  
706 concentration. For *wnt8* injection, 32 ng total/embryo of *pCSKA-xwnt8* (Addgene #  
707 16866) plasmid DNA was injected into the 2 dorsal blastomeres of 4-cell stage  
708 embryos. After injection, embryos were collected at early tailbud stage, fixed in 4%  
709 PFA in PBS for two hours at RT and washed extensively with PBS to remove residual  
710 PFA. Images were acquired on a color camera-equipped stereomicroscope (Zeiss).  
711 To assess morpholino specificity, we cloned the 5' coding or untranslated region (UTR)  
712 of *Xenopus daam1* and 2 genes, respectively, containing the morpholino binding sites,  
713 upstream of the *gfp* open reading frame (ORF), into pCS2+ vector. The presence of  
714 *daam* sequences did not affect GFP fluorescence. Plasmids were then linearized  
715 using NotI restriction enzyme and mRNA was transcribed *in vitro* using Sp6 mMessage  
716 mMachine kit (ThermoFisher), following the manufacturer's instructions. 250 pg total  
717 of *d1/2-gfp* mRNAs were injected anally into 2 blastomeres of 4- or 8-cell stage

718 embryos, together with 30 ng total of *daam1/2* or control MOs (as indicated in  
719 Extended Data Fig. 4). Finally, injected embryos were collected at the neurula stage  
720 and processed for Western blot analysis.

721

### 722 **RT-qPCR**

723 RNA extraction from HEK293T cells and mouse small intestinal organoids, cDNA  
724 preparation and RT-qPCR were performed according to established protocols<sup>52</sup>, with  
725 minor modifications. Briefly, HEK293T cells from single wells of a 6-well plate were  
726 pelleted and total RNA was extracted using the RNeasy MiniKit (QIAGEN), following  
727 the manufacturer's instructions. For organoid total RNA preparation, three single wells  
728 of a 48-well plate were pooled together after removing Matrigel with Cell Recovery  
729 Solution (Corning), 1 hour at 4 °C. 1 µg of total RNA was used for cDNA synthesis with  
730 Oligo(dT)<sub>18-22</sub> primers by SuperScript III reverse transcriptase (ThermoFisher). 2 µl  
731 cDNA was then used for quantitative RT-PCR, which was performed on a CFX  
732 Connect Real-Time System thermal cycler (BioRad), using GoTaq qPCR master mix  
733 (Promega) and including 2 to 3 biological replicates for each marker and reference  
734 gene. Expression levels were normalized to housekeeping gene actin. Primer  
735 sequences are listed in Table 1.

736

737

738





| Immunofluorescence                           |                          |                |                          |
|----------------------------------------------|--------------------------|----------------|--------------------------|
| Primary Antibody                             | Company                  | Catalog Number | Dilution                 |
| Mouse anti-Daam1 (WW-3)                      | Santa Cruz Biotechnology | sc-100942      | 1:250                    |
| Mouse anti-Daam2 (E-1)                       | Santa Cruz Biotechnology | sc-515129      | 1:250                    |
| Mouse anti-Ki67 (B56)                        | Abcam                    | ab279653       | 1:300                    |
| Rabbit anti-human Lysozyme EC 3.2.1.17       | Dako                     | A009902-2      | 1:500                    |
| Secondary Antibody or Fluorescent Label      |                          |                |                          |
| Phalloidin Atto 488                          | Sigma                    | 49409-10NMOL   | 1:50                     |
| SNAP-Surface 549                             | NEB                      | S9112S         | 1:1000 (1 $\mu$ M final) |
| Ulex Europaeus I Agglutinin, FITC conjugated | Szabo Scandic            | VECFL-1061/2   | 1:500                    |
| Goat anti-mouse IgG Alexa Fluor Plus 488     | ThermoFisher             | A32723         | 1:500                    |
| Donkey anti-mouse IgG Alexa Fluor 546        | ThermoFisher             | A10036         | 1:500                    |
| Donkey anti-rabbit IgG Alexa Fluor 568       | ThermoFisher             | A10042         | 1:500                    |

740

**Table 2.** List of antibodies or fluorescent labels used for immunofluorescence in this study.

| Western Blot                                                     |                           |                |          |
|------------------------------------------------------------------|---------------------------|----------------|----------|
| Primary Antibody                                                 | Company                   | Catalog Number | Dilution |
| Chicken anti-GFP                                                 | Aves Labs                 | 1020           | 1:1000   |
| <b>Mouse anti-HA (2-2.2.14)</b>                                  | ThermoFisher              | 26183          | 1:1000   |
| Rabbit anti-Myc (71D10)                                          | Cell Signaling Technology | 2278           | 1:1000   |
| Rabbit anti-V5 (D3H8Q)                                           | Cell Signaling Technology | 13202          | 1:1000   |
| Rabbit anti-active (non-phosphorylated) $\beta$ -Catenin (D13A1) | Cell Signaling Technology | 8814           | 1:1000   |
| Rabbit anti-CD71 (D7G9X) (Transferrin Receptor, TFR)             | Cell Signaling Technology | 13113          | 1:1000   |
| Mouse anti-Daam1 (WW-3)                                          | Santa Cruz Biotechnology  | sc-100942      | 1:500    |
| Rabbit anti-Dvl2 (30D2)                                          | Cell Signaling Technology | 3224           | 1:1000   |
| Rabbit anti-Dvl3                                                 | Cell Signaling Technology | 3218           | 1:1000   |
| Rabbit anti-Lrp6 (C5C7)                                          | Cell Signaling Technology | 2560           | 1:1000   |
| Mouse anti-ROR2 (H-1)                                            | Santa Cruz Biotechnology  | sc-374174      | 1:1000   |
| Rabbit $\beta$ -actin (13E5)                                     | Cell Signaling Technology | 4970           | 1:3000   |
| Rabbit anti-Gapdh (14C10)                                        | Cell Signaling Technology | 85925          | 1:3000   |
| Mouse anti- $\alpha$ -tubulin (DM1A)                             | Cell Signaling Technology | 3873           | 1:3000   |
| <b>Secondary Antibody</b>                                        |                           |                |          |
| Donkey anti-rabbit IRDye 680 RD                                  | Li-COR                    | 926-68073      | 1:4000   |
| Donkey anti-rabbit IRDye 800 CW                                  | Li-COR                    | 926-32213      | 1:4000   |
| Donkey anti-mouse IRDye 680 RD                                   | Li-COR                    | 926-68072      | 1:4000   |
| Donkey anti-mouse IRDye 800 CW                                   | Li-COR                    | 926-32212      | 1:4000   |
| Donkey anti-chicken IRDye 800 CW                                 | Li-COR                    | 926-32218      | 1:4000   |

741

**Table 3.** List of antibodies used for Western blot. Antibodies also used for IP are in bold.

742  
743  
744  
745

746

Figure 1

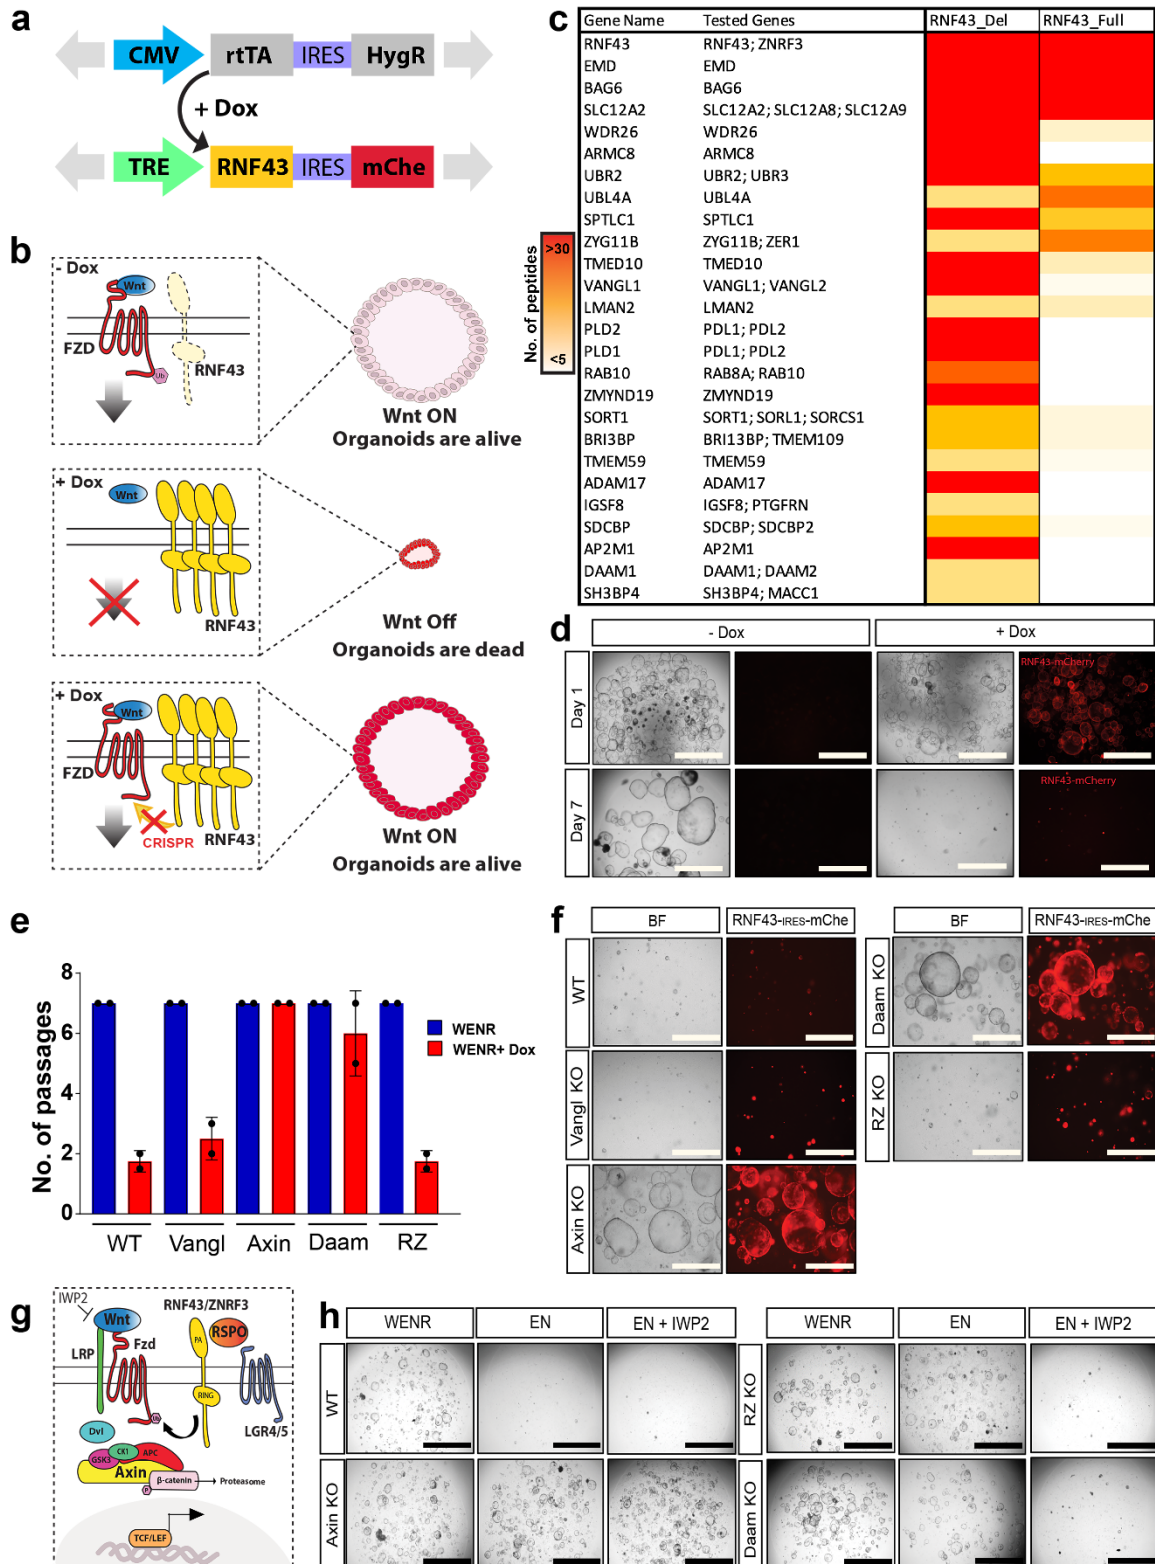

747

20

748  
749  
750  
751  
752  
753  
754  
755  
756  
757  
758  
759  
760  
761  
762  
763  
764  
765  
766

**Fig. 1 Functional CRISPR screening of Rnf43-interacting proteins.** **a**, Schematic of the DNA constructs used to generate small intestinal organoids expressing doxycycline-inducible *Rnf43-IRES-mCherry*. mCherry is used as a proxy for Rnf43 expression. **b**, Schematic showing the CRISPR-based screening of Rnf43-expressing organoids. Doxycyclin addition turns on Rnf43 expression and organoids die, unless downstream components necessary for Rnf43 activity are eliminated via CRISPR/Cas9 KO. **c**, List of Rnf43-interacting proteins identified via mass spectrometry. Abundance of each protein is represented as the number of peptides detected, according to the color scale on the left. **d**, Organoid assay showing robust Rnf43 expression upon doxycyclin treatment. Note that at day 7 all organoids expressing Rnf43 (here visualized through mCherry fluorescence) are dead. **e**, Bar plot quantification of organoid survival after indicated passages. Only Axin and Daam CRISPR-KO organoids grow in the presence of Rnf43 overexpression. **f**, Survival assay of WT and indicated CRISPR KO mutant organoids after Rnf43 induction. **g**, Schematic illustrating the growth factor withdrawal assay used in h, to determine Rnf43-interactor epistasis in the Wnt pathway. **h**, Growth factor withdrawal assay on WT and indicated CRISPR mutant organoids. All scale bars represent 1000  $\mu\text{m}$ .

Figure 2

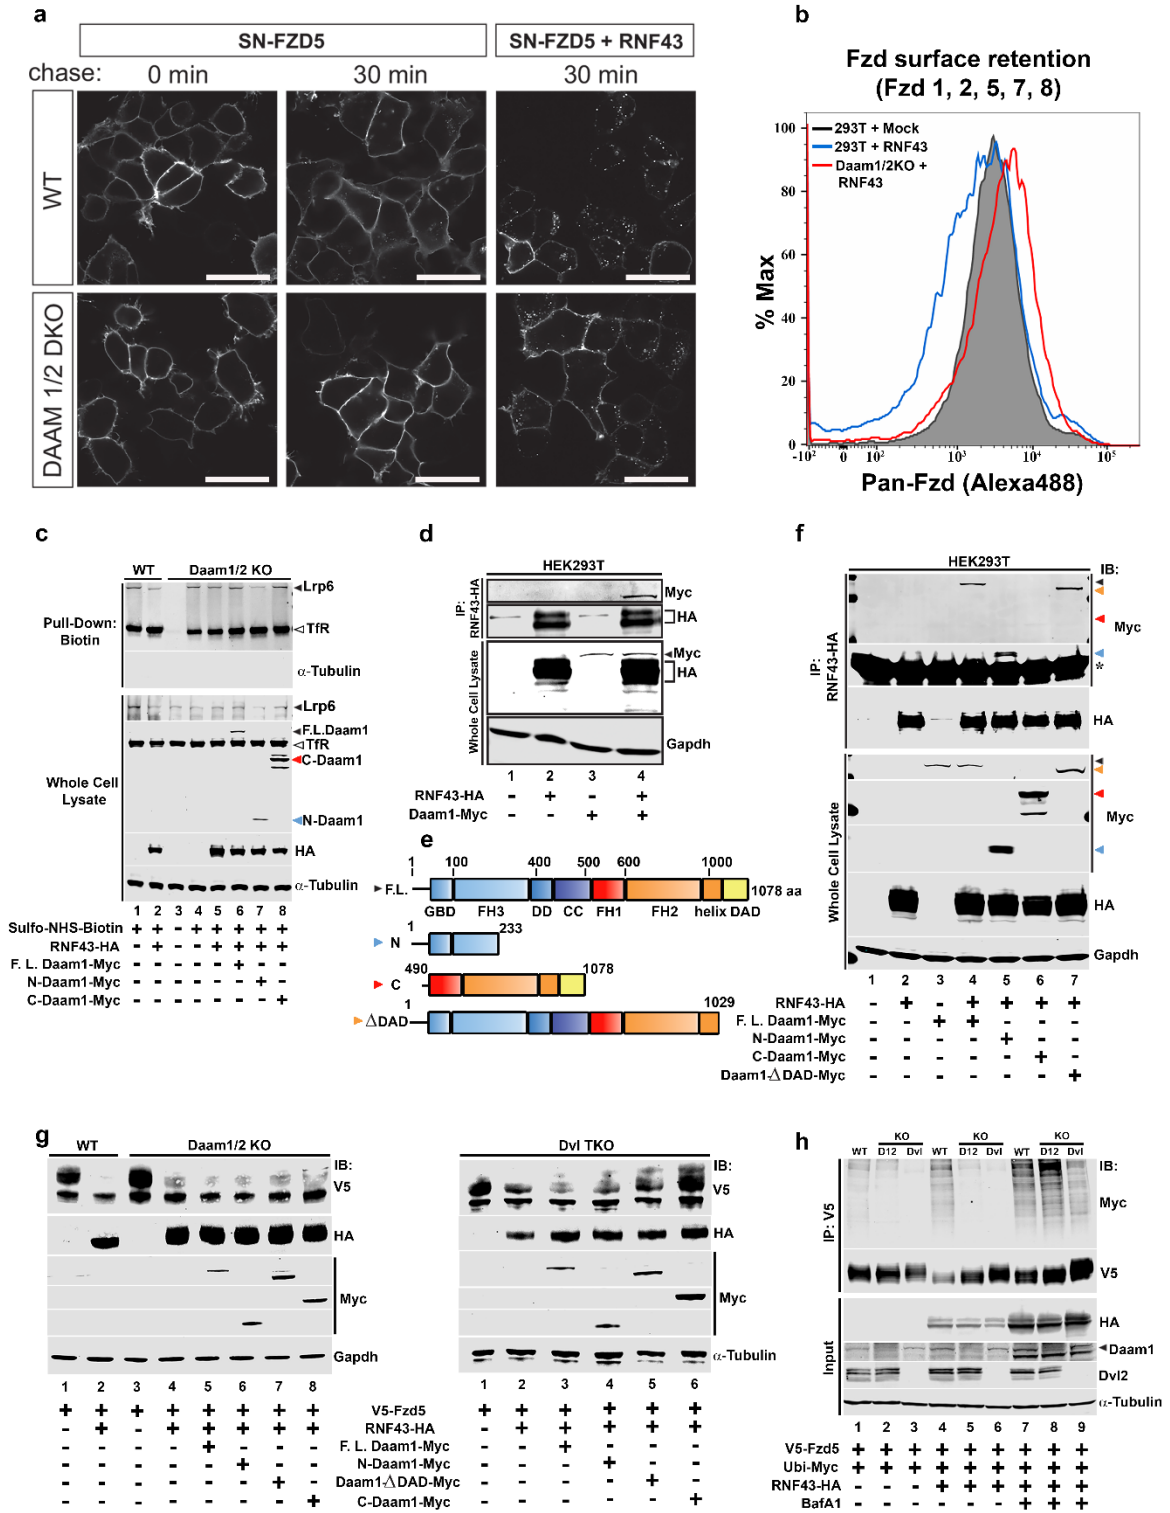

768  
769  
770  
771  
772  
773  
774  
775  
776  
777  
778  
779  
780  
781  
782  
783  
784  
785  
786  
787  
788  
789  
790  
791  
792  
793

**Fig. 2 Daam is required for Rnf43-dependent Frizzled endocytosis.** **a**, Subcellular localization of SNAP–Fzd5 in WT or Daam1/2 DKO HEK293T cells co-transfected with control empty vector or Rnf43. Surface SNAP–Fzd5 was labeled with SNAP–Alexa549 for 15 min and chased for 30 min. Scale bars represent 20  $\mu$ m. **b**, FACS analysis of plasma membrane levels of Fzd receptors in WT and D1/2 DKO HEK293T cells, with or without Rnf43 overexpression. **c**, Western blot of representative cell surface protein biotinylation and pull-down assay on HEK293T cells transfected with indicated constructs, showing that Daam1/2 KO also prevents Rnf43-dependent internalization of the Wnt co-receptor Lrp6. Transferrin receptor (TfR) was used as a negative control. **d**, IP assay used to show interaction between HA-tagged Rnf43 and Myc-tagged Daam1. **e**, Schematic of the Daam1 full length and deletion constructs used in this study to map the Rnf43-interacting domain of Daam1. Daam1 architecture domain and relative amino acid position are indicated. GBD, Rho GTPase binding domain; FH3, Formin homology 3 domain; DD, dimerization domain; CC, coiled coil domain; FH1, Formin homology 1 domain; FH2, Formin homology 2 domain; Helix, an amphipathic helix involved in interaction with FH3 domain; DAD, Diaphanous autoregulatory domain. **f**, IP experiment showing that the N-terminal domain of Daam1 is required for Rnf43 interaction. Colored arrowheads correspond to the different Daam1 constructs, as shown in panel e, and indicate their migration position on the blot. **g**, Western blots showing Frizzled degradation by Rnf43 in WT, D1/2 DKO and Dvl TKO HEK293T cells. **h**, Western blot showing ubiquitin levels of Fzd5 in WT, D1/2 and Dvl mutant cells.  $\alpha$ -tubulin was used as a loading control in c, g and h. Gapdh was used as a loading control in d, f and g.

**Figure 3**

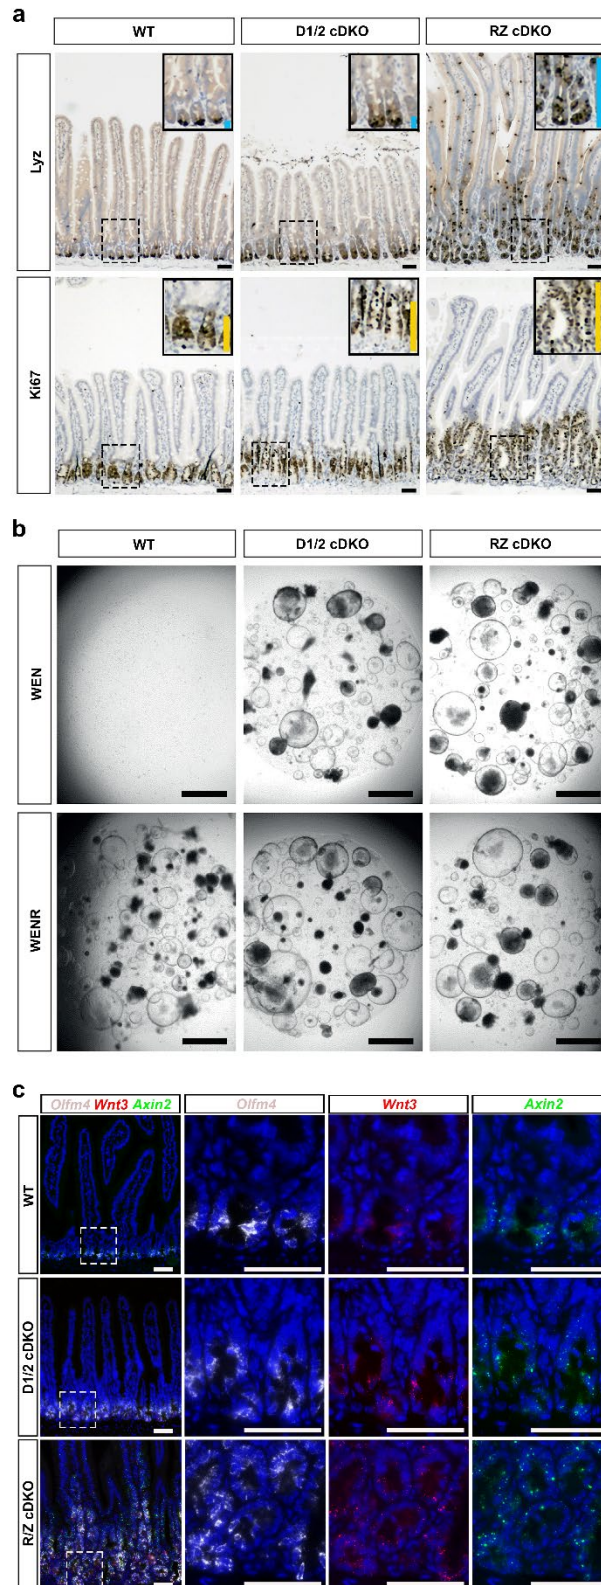



795  
796  
797  
798  
799  
800  
801  
802  
803  
804  
805  
806  
807  
808

**Fig. 3 Daam1/2 cDKO mice show a milder phenotype than RZ cDKO, despite maintaining Rspo1 independence.** **a**, Small intestine histological sections from WT, D1/2 and RZ conditional double knockout mice stained for lysozyme (Lyz), a Paneth cell marker, and Ki67, used as a proliferation marker. Insets show magnification of dash boxed areas. The extent of Lyz-positive Paneth zones and Ki67-positive proliferative zones are indicated by blue and yellow side bars, respectively. **b**, Organoids derived from WT, D1/2 and RZ cDKO mice, showing that D1/2 and RZ mutant organoids can survive in the absence of R-Spondin, unlike WT organoids. **c**, RNA-scope *in situ* hybridization analysis with probes targeting *Olfm4* (stem cell marker), *Wnt3* (Paneth cell marker) and *Axin2* (canonical Wnt target). White dashed boxed areas shown in the left “merge” panels are enlarged and shown on the right as single probe stainings. Scale bars represent 50  $\mu\text{m}$  in a and c, and 1000  $\mu\text{m}$  in b.

Figure 4

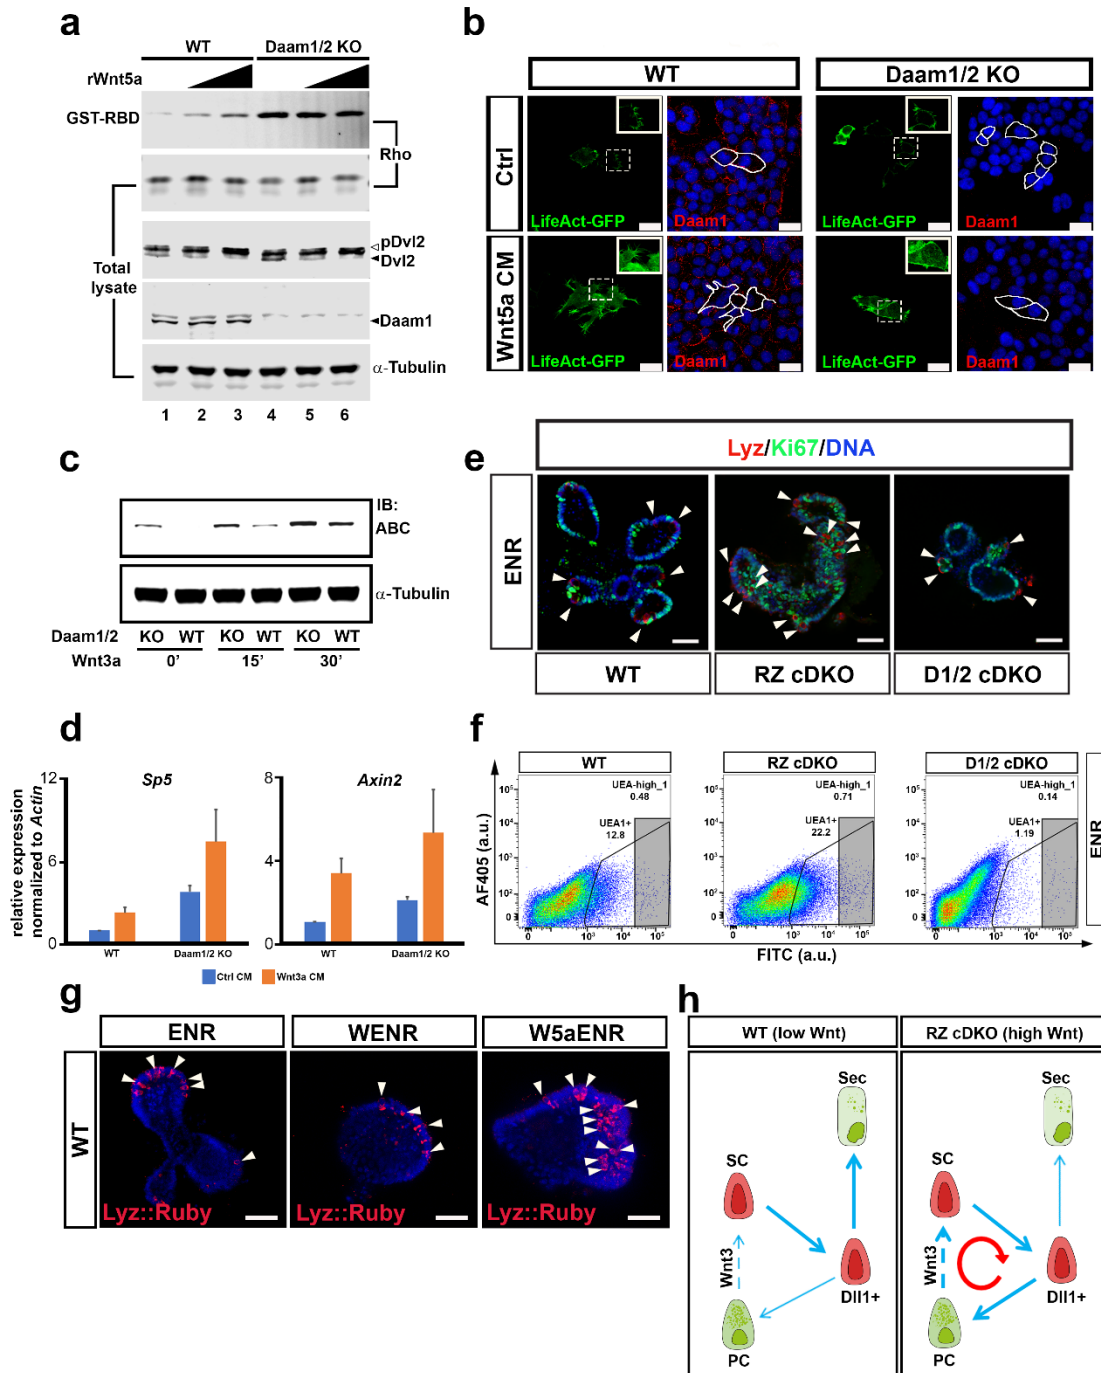

810  
811  
812  
813  
814  
815  
816  
817  
818  
819  
820  
821  
822  
823  
824  
825  
826  
827  
828  
829  
830  
831  
832  
833  
834  
835

**Fig. 4 Daam knockout impairs non-canonical Wnt while enhancing canonical Wnt signaling.** **a**, Active Rho pull-down assay. WT and D1/2 KO cells were treated with recombinant Wnt5a (0, 200 or 400 ng/ml) for 30 minutes at 37 °C prior to Western blot analysis. White and black arrowheads point to phosphorylated and unphosphorylated Dvl2, respectively, which served to monitor for Wnt5a activity. Daam1 immunoblot was used to confirm its absence in D1/2 KO cells. **b**, WT and D1/2 KO HEK293T cells transfected with LifeAct-GFP were treated with Wnt5a CM for 2 hours at 37 °C, before immunofluorescence analysis. Insets show magnification of the dash boxed area. White lines indicate transfected cell location among non-transfected cells. Scale bars represent 20  $\mu$ m. **c**, Western blot comparing levels of active  $\beta$ -catenin in WT and D1/2 KO HEK293T cells. Cells were treated with Wnt3a CM for the indicated time, prior to analysis.  $\alpha$ -tubulin was used as a loading control in **a** and **c**. **d**, RT-qPCR analysis of canonical Wnt target genes *Sp5* and *Axin2* on WT and D1/2 KO cells treated overnight with Wnt3a CM. Expression levels are normalized to *Actin* mRNA. Error bars represent standard deviation across three biological replicates. **e**, Organoids derived from WT, RZ and D1/2 cDKO mice, cultured in ENR medium and stained for lysozyme and Ki67. Arrowheads point at Paneth cells (Lyz<sup>+</sup>, in red). **f**, FACS analysis of organoids from indicated mouse genotypes, stained with fluorescein isothiocyanate (FITC)-labeled *Ulex europaeus* agglutinin 1 (UEA-1). **g**, Confocal imaging of lysozyme::Ruby WT SI organoid reporter line, expressing Ruby RFP in Paneth cells. Organoids were cultured in ENR, WENR on Wnt5a-containing ENR. Scale bars in **e** and **g** represent 50  $\mu$ m **h**, Schematic showing Paneth cell- intestinal stem cell double positive feedback in normal homeostatic and Wnt high conditions (such as in RZ cDKO intestine).

**Figure 5**

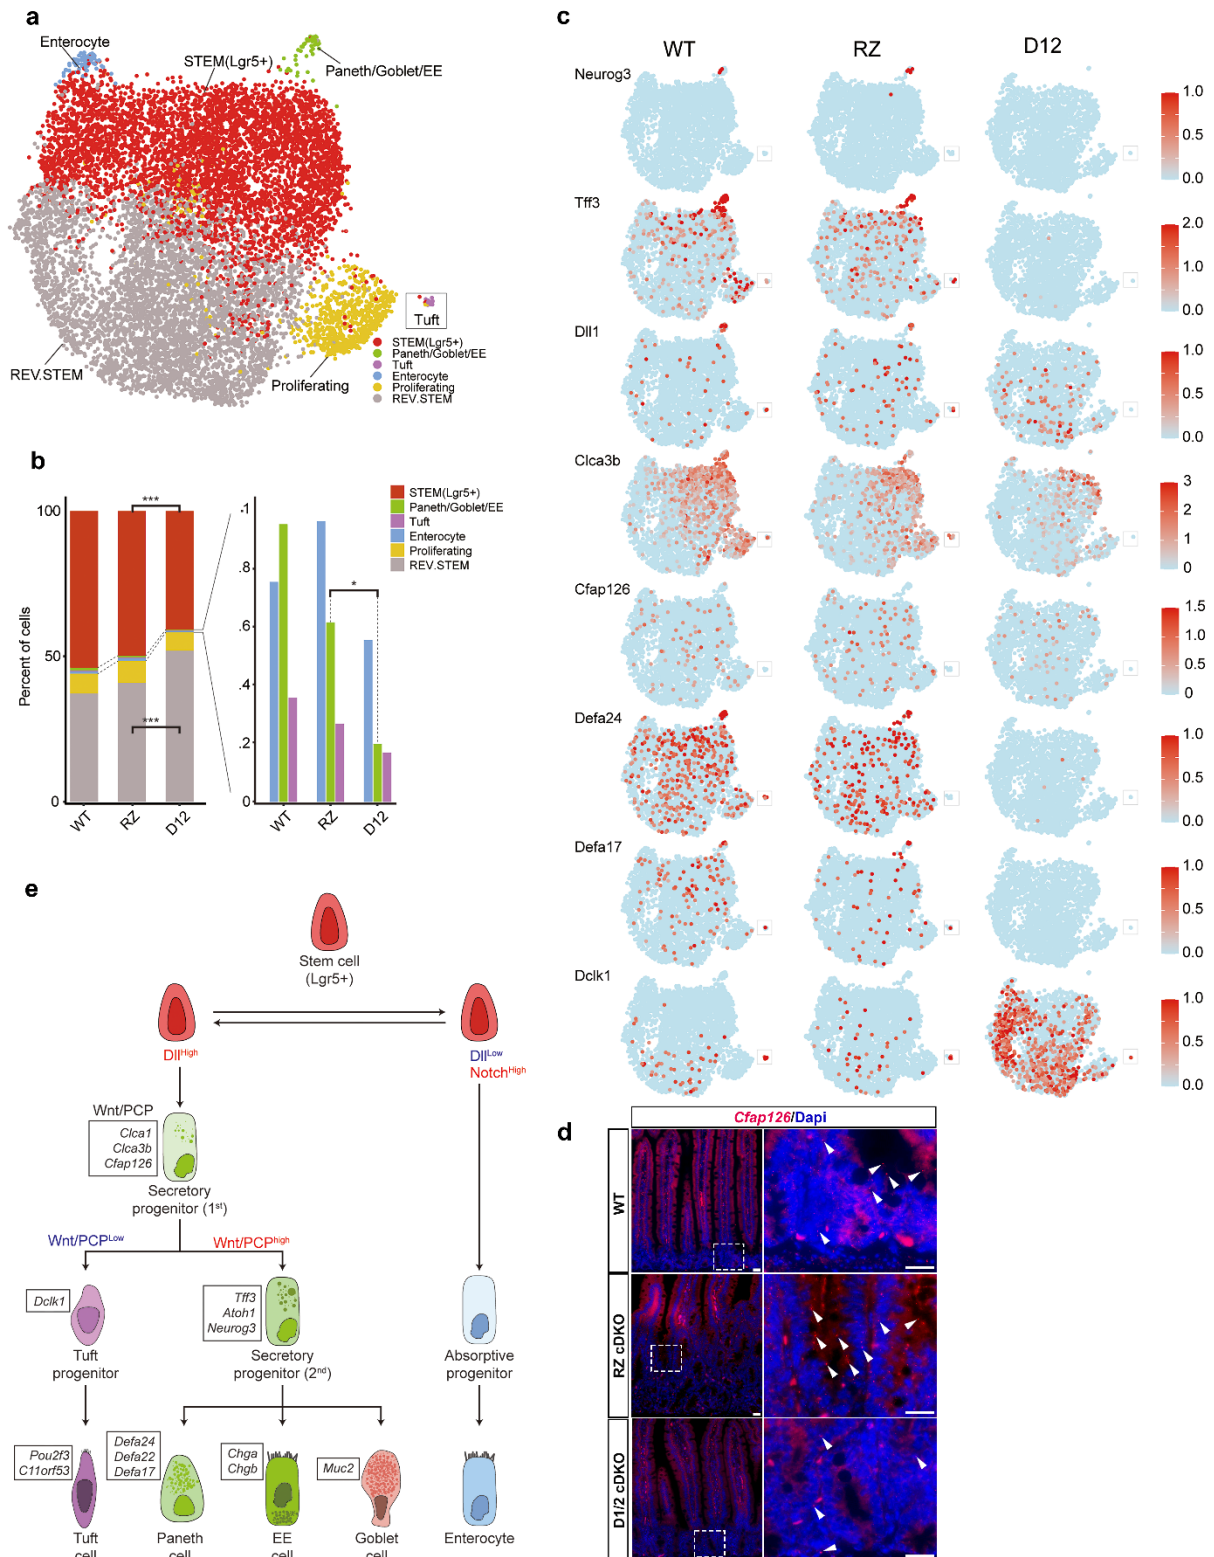

836

837  
838  
839  
840  
841  
842  
843  
844  
845  
846  
847  
848  
849  
850  
851  
852  
853  
854  
855

**Fig. 5 scRNA-seq analysis for WT, RZ and D1/2 cDKO organoids.** **a**, Integrated UMAP cluster map including WT, RZ, and D1/2 samples. **b**, Cell-type composition of WT, RZ, and D12 organoids. p-values were calculated by Fisher's exact tests. Corrected p-values were described as \*P < 0.01, \*\*\*P < 0.001. **c**, Expression pattern of selected cell type markers on UMAP clusters from individual samples. Red color indicates maximum expression level while blue color indicates minimum expression level for each gene. **d**, *In situ* hybridization using an RNA-Scope probe specific for *Cfap126* (*flattop*) in the small intestinal crypts of WT, RZ and D1/2 cDKO mice. Right panels are enlargement of areas included in the dash boxes on the left. White arrowheads indicate the fluorescent signal from single mRNA transcripts (red puncta). Note the decrease in *Cfap126* expression in D1/2 KO mice. Scale bars represent 20  $\mu$ m. **e**, Cellular flow chart showing the stepwise commitment from Lgr5+ stem cells. Dll<sup>high</sup> progenitors can generate secretory cells including tuft, Paneth, enteroendocrine (EE) and goblet cells, while Dll<sup>low</sup> will only generate enterocytes. Among Dll<sup>high</sup> progenitors, only cells with active Wnt/PCP signaling can mature into Paneth, enteroendocrine and goblet cells.

## Extended Data Fig. 1

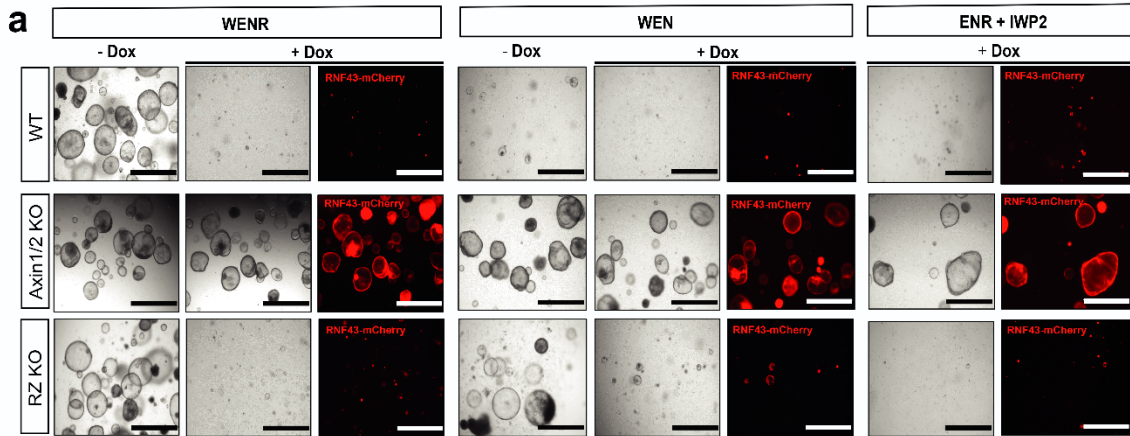

857  
858  
859  
860  
861  
862  
863  
864

**Extended Data Fig. 1 Specificity assay for *Rnf43-IRES-mCherry* overexpression in SI organoids. a,** In contrast to WT organoids, Axin1/2 CRISPR KO mutants can survive in the absence of Rspo1 and Wnt ligands, while RZ KO organoids can only survive if Wnt is present. *Rnf43-IRES-mCherry* induction via treatment with 1 µg/ml doxycyclin causes organoids to die in all conditions, except for Axin1/2 KO due to constitutive Wnt/β-catenin signaling activation. Scale bars represent 1000 µm.

## Extended Data Fig. 2

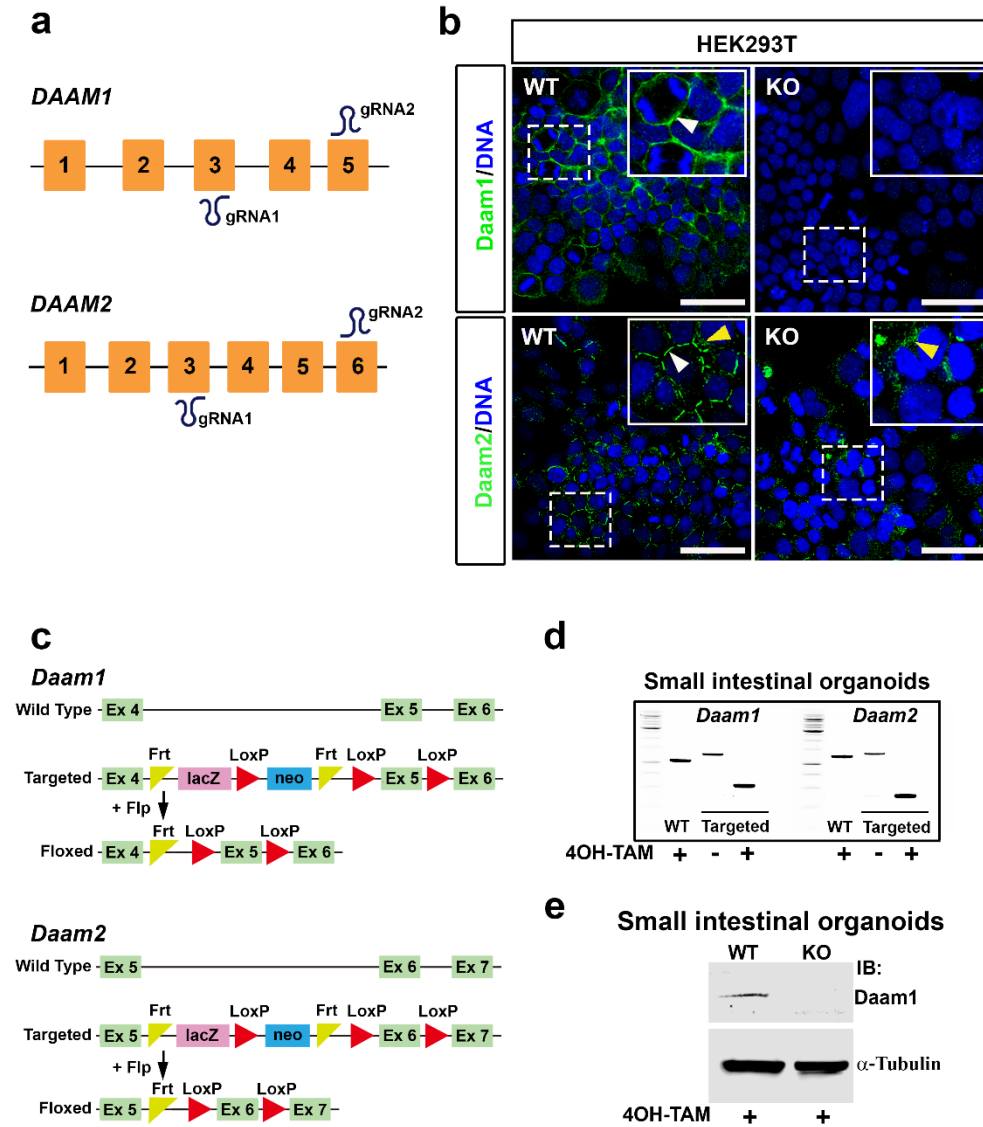



866  
867  
868  
869  
870  
871  
872  
873  
874  
875  
876  
877  
878  
879  
880  
881  
882  
883

**Extended Data Fig. 2 Validation of Daam1/2 knockout in HEK293T cells and mice.**  
**a**, Diagram of the dual gRNA targeting strategy used for human *DAAM1* and *2*, showing the exons targeted by the gRNA pairs. **b**, Immunostaining for DAAM1 and DAAM2 performed in WT and D1/2 KO cells. White dashed boxed areas are enlarged in the inset, top right corners. White arrowheads point at DAAM-specific membrane staining. Yellow arrowheads indicate non-specific staining visible only with anti-DAAM2 antibody, present in both WT and KO cells. Scale bars represent 50  $\mu\text{m}$ . **c**, Schematic diagram showing the targeting strategy used to generate floxed mouse *Daam1* and *Daam2* alleles, for conditional knockout. Exon 5 and Exon 6 were targeted in *Daam1* and *2*, respectively. **d**, PCR and agarose gel electrophoresis used to verify genotype and Cre-mediated recombination in D1/2 cDKO mouse organoids. **e**, Western blot confirming the absence of Daam1 protein in Vil-CreERT2 D1/2 cDKO organoids, after overnight treatment with 1  $\mu\text{g/ml}$  4-hydroxytamoxifen (4OH-TAM). After CreER induction with 4OH-TAM, organoids were cultured for at least one passage (5 days) prior to Western blot analysis.  $\alpha$ -Tubulin was used as a loading control.

### Extended Data Fig. 3

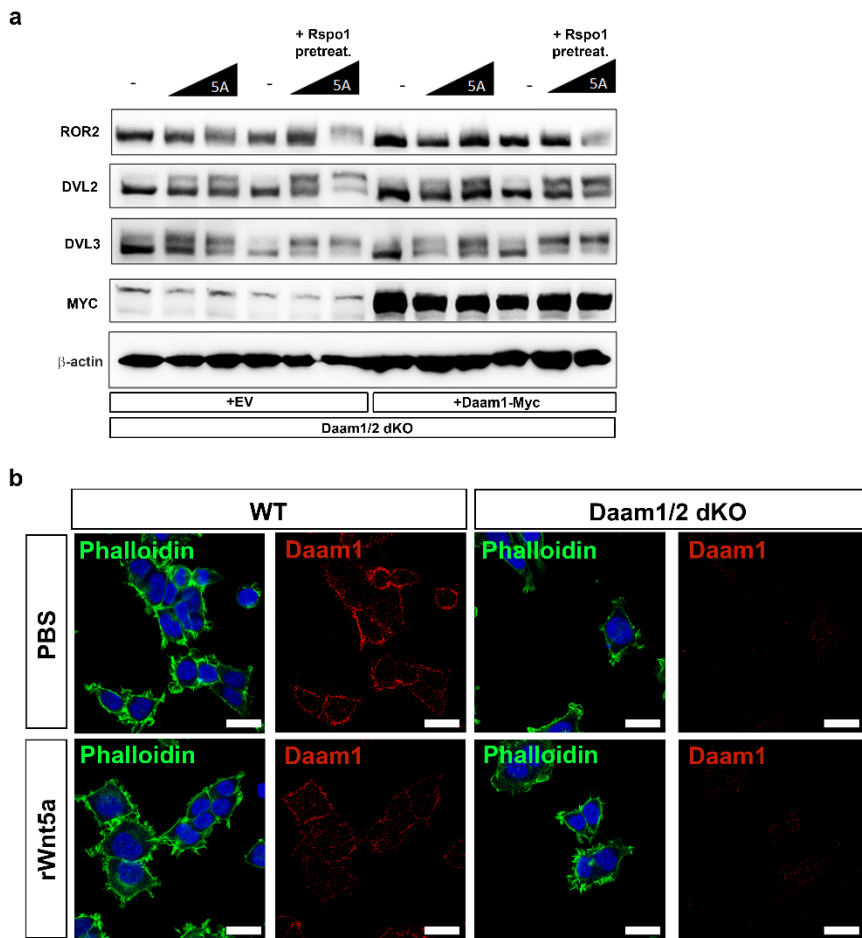

885  
886  
887  
888  
889  
890  
891  
892  
893  
894  
895  
896  
897  
898

**Extended Data Fig. 3 Daam1/2 KO impairs downstream events of Wnt/PCP signaling.** **a**, Western blot analysis showing Wnt5a-dependent phosphorylation of ROR2 (a non-canonical Wnt co-receptor), Dvl2 and Dvl3, visualized as changes in electrophoretic mobility. Note that Wnt5a induces similar mobility shifts in both D1/2 KO cells and D1/2 KO cells transfected with Daam1-Myc. Rspo1 treatment was used to boost Wnt5a treatment, with no noticeable differences between KO and rescued samples.  $\beta$ -actin was used as a loading control. **b**, Confocal imaging of WT and D1/2 KO cells treated with recombinant Wnt5a (rWnt5a) protein or with PBS (mock controls), and stained for F-actin (phalloidin) and Daam1. Phalloidin reveals that actin cytoskeleton rearrangements and filopodia formation occur in WT cells upon rWnt5a treatment, but are strongly reduced in D1/2 KO cells. Daam1 protein absence in KO cells was confirmed by immunostaining. Scale bars represent 20  $\mu$ m.

## Extended Data Fig. 4

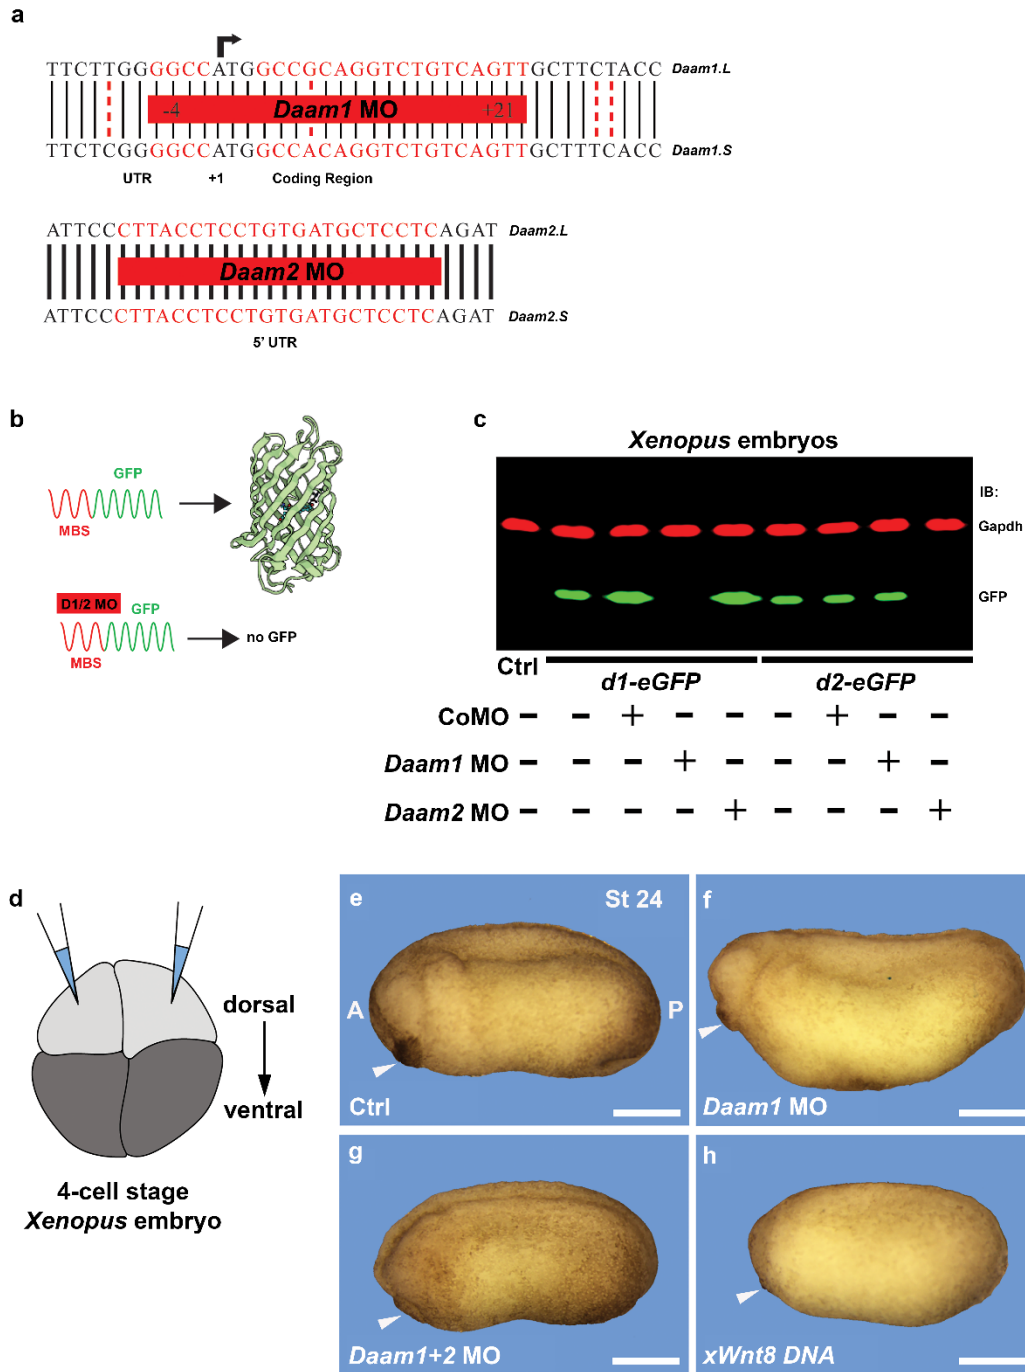

900  
901  
902  
903  
904  
905  
906  
907  
908  
909  
910  
911  
912  
913  
914  
915  
916  
917  
918  
919  
920  
921

**Extended Data Fig. 4 Knock-down of *Daam1* and *2* in *Xenopus laevis* embryos phenocopy canonical Wnt activation.** **a**, Schematic diagram showing the *Daam1* and *2* sequences (in red) targeted by the Morpholino (MO) antisense oligos. For each *Daam* gene, MO oligos were designed to target both L and S homeolog sequences at the same time. **b**, Schematic of the experiment to assess morpholino specificity and effectiveness. MO binding sequences were cloned upstream of the GFP coding sequence, generating *d1-GFP* and *d2-GFP* constructs. **c**, Western blot of protein lysates from *Xenopus* embryos injected with *d1-* and *d2-eGFP* mRNAs. *Daam1* MO efficiently inhibits *d1-eGFP* translation, but not *d2-eGFP*, and vice versa for *Daam2* MO. Standard MO (CoMO) was used as a control. **d**, Schematic showing *Daam1/2* MO or *Wnt8* DNA microinjection into 4-cell *Xenopus* embryos. The two dorsal blastomeres of 4-cell stage embryos were targeted for injections, as these are fated to generate dorso-anterior structures, whose development is strongly regulated by Wnt activity. **e-h**, *Xenopus* embryos injected with the indicated antisense oligo or DNA plasmid and collected at stage 24 for phenotypic analysis. Ctrl embryos were injected with CoMO, which does not induce any developmental abnormality. Embryos are all oriented so that their antero-posterior (A-P) axis has the head on the left, tail on the right, as indicated in panel e. White arrowheads point to the cement gland, a prominent pigmented anterior structure, which is reduced in *Daam* morphants as well as *Wnt8*-injected embryos. Scale bars represent 500  $\mu\text{m}$ .

## Extended Data Fig. 5

**a**

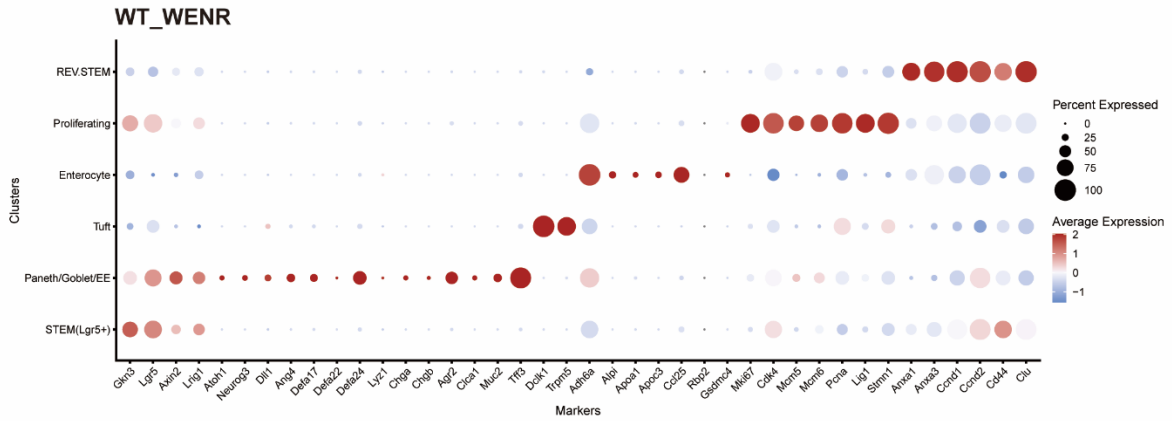

**b**

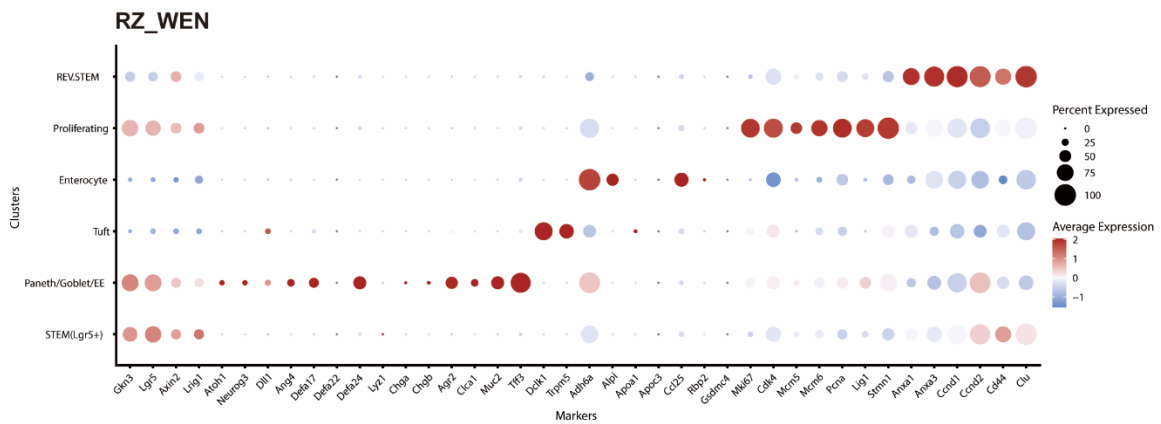

**c**

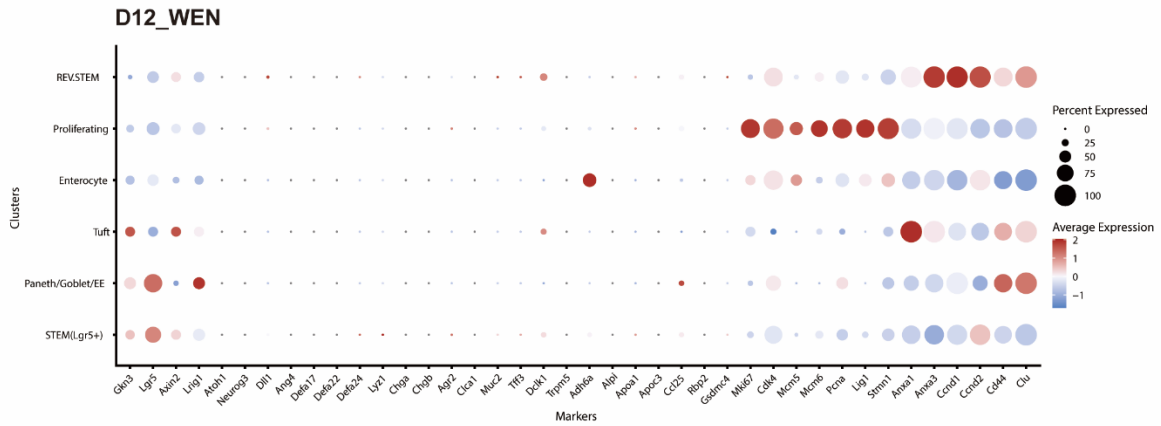

922

923

924 **Extended Data Fig. 5 Dot plots for cell type annotation.** For each cluster, the  
925 average expression levels of the corresponding gene are shown color-coded  
926 according to the scale on the right, with a gradient from blue (minimum expression) to  
927 red (maximum expression). The size of the dots indicates the fraction of cells showing  
928 expression of the corresponding genes. **a**, Wildtype organoids cultured in WENR  
929 condition. Based on the expression patterns of this sample, the integrated UMAP  
930 clusters shown in **Fig. 5** could be annotated with the different cell types. **b**, Organoids  
931 from RZ cDKO mice. **c**, Organoids from D1/2 cDKO mice.

932

## Extended Data Fig. 6

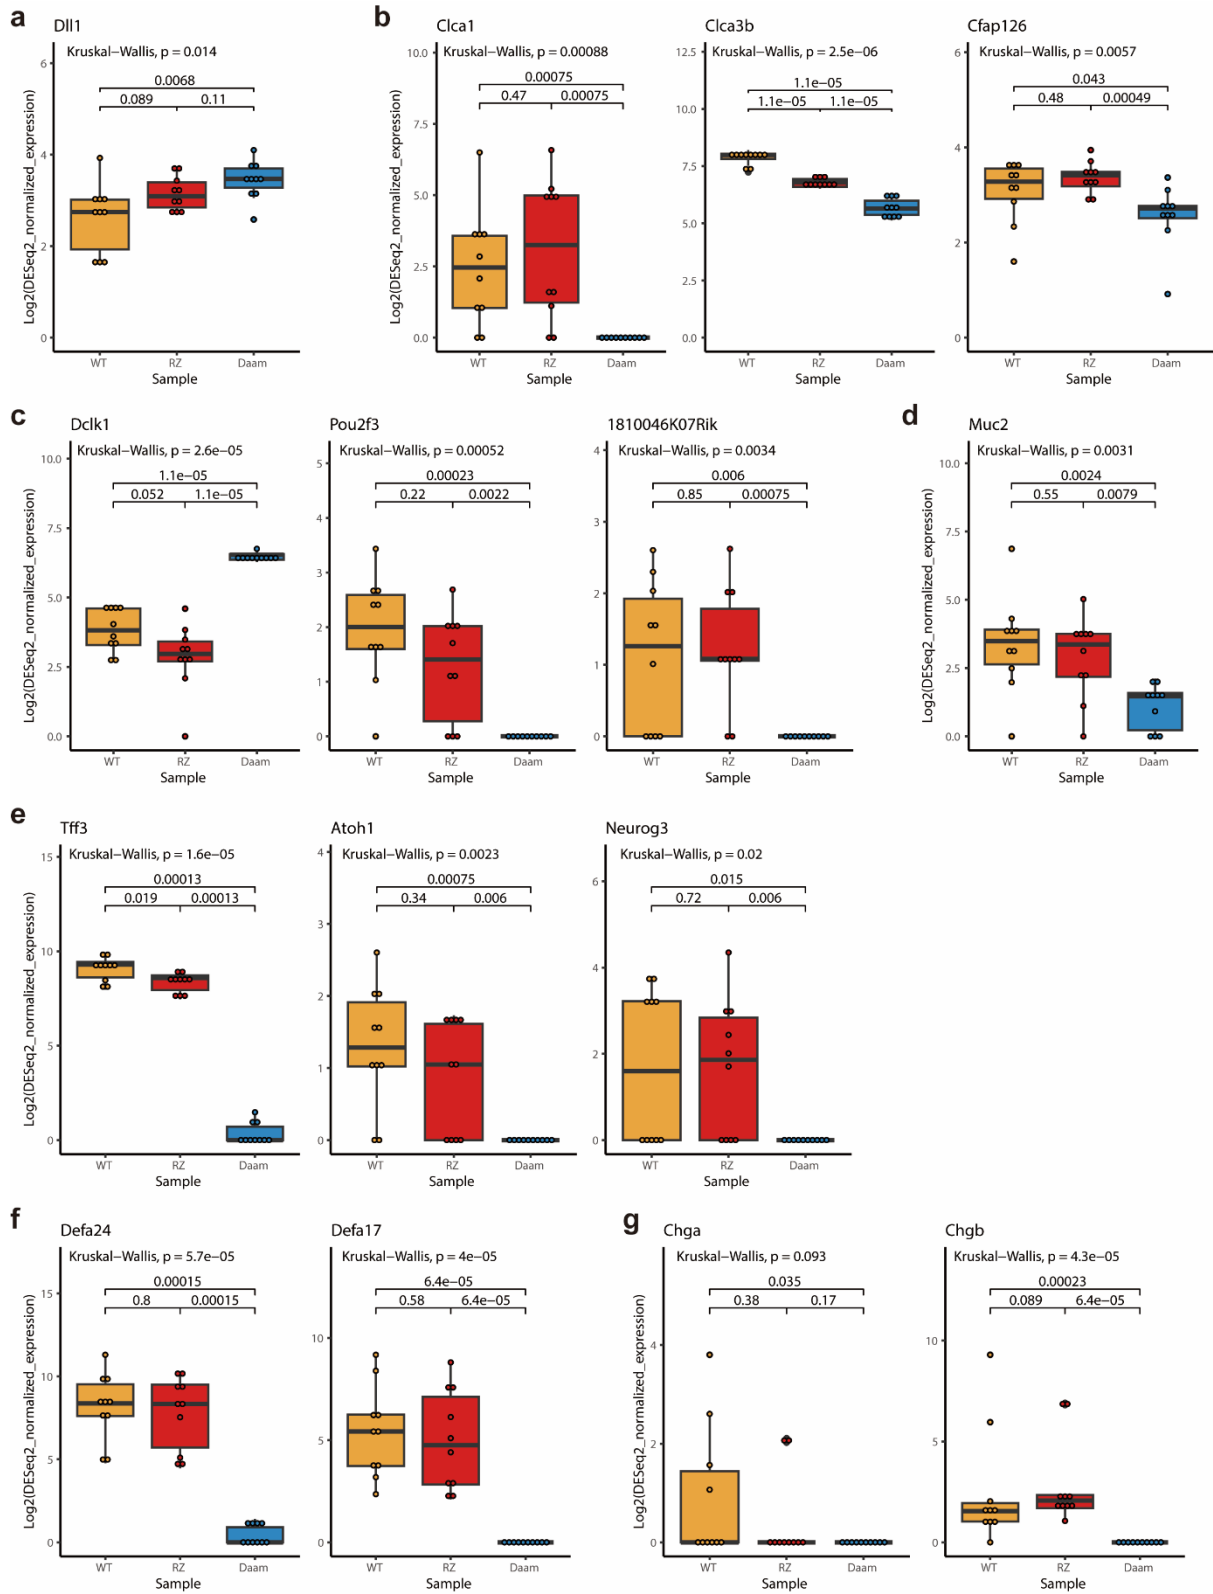



934  
935  
936  
937  
938  
939  
940  
941  
942

**Extended Data Fig. 6 Comparisons of expression levels of cell fate marker genes with pseudobulk RNA-seq data.** Normalized expression levels of corresponding genes were compared across samples. Each paired comparison was tested using the Wilcoxon test. Kruskal-Wallis test was used to test for the three samples. **a**, Dll1. **b**, Wnt/PCP target genes. **c**, Tuft cell marker genes. **d**, Goblet cell marker gene. **e**, Secretory progenitor marker genes. **f**, Paneth cell marker genes. **g**, Enteroendocrine cell marker genes.

## 943 References

944

- 945 1 Beumer, J. & Clevers, H. Cell fate specification and differentiation in the adult mammalian intestine. *Nat*  
946 *Rev Mol Cell Biol* **22**, 39-53, doi:10.1038/s41580-020-0278-0 (2021).
- 947 2 Colozza, G., Park, S. Y. & Koo, B. K. Clone wars: From molecules to cell competition in intestinal stem cell  
948 homeostasis and disease. *Exp Mol Med* **54**, 1367-1378, doi:10.1038/s12276-022-00854-5 (2022).
- 949 3 Clevers, H. C. & Bevins, C. L. Paneth cells: maestros of the small intestinal crypts. *Annu Rev Physiol* **75**,  
950 289-311, doi:10.1146/annurev-physiol-030212-183744 (2013).
- 951 4 Nusse, R. & Clevers, H. Wnt/beta-Catenin Signaling, Disease, and Emerging Therapeutic Modalities. *Cell*  
952 **169**, 985-999, doi:10.1016/j.cell.2017.05.016 (2017).
- 953 5 Albrecht, L. V., Tejada-Munoz, N. & De Robertis, E. M. Cell Biology of Canonical Wnt Signaling. *Annu Rev*  
954 *Cell Dev Biol* **37**, 369-389, doi:10.1146/annurev-cellbio-120319-023657 (2021).
- 955 6 Koo, B. K. *et al.* Tumour suppressor RNF43 is a stem-cell E3 ligase that induces endocytosis of Wnt  
956 receptors. *Nature* **488**, 665-669, doi:10.1038/nature11308 (2012).
- 957 7 Hao, H. X. *et al.* ZNRF3 promotes Wnt receptor turnover in an R-spondin-sensitive manner. *Nature* **485**,  
958 195-200, doi:10.1038/nature11019 (2012).
- 959 8 Farin, H. F. *et al.* Visualization of a short-range Wnt gradient in the intestinal stem-cell niche. *Nature* **530**,  
960 340-343, doi:10.1038/nature16937 (2016).
- 961 9 de Lau, W. *et al.* Lgr5 homologues associate with Wnt receptors and mediate R-spondin signalling.  
962 *Nature* **476**, 293-297, doi:10.1038/nature10337 (2011).
- 963 10 Glinka, A. *et al.* LGR4 and LGR5 are R-spondin receptors mediating Wnt/beta-catenin and Wnt/PCP  
964 signalling. *EMBO Rep* **12**, 1055-1061, doi:10.1038/embor.2011.175 (2011).
- 965 11 Tsukiyama, T. *et al.* A phospho-switch controls RNF43-mediated degradation of Wnt receptors to  
966 suppress tumorigenesis. *Nat Commun* **11**, 4586, doi:10.1038/s41467-020-18257-3 (2020).
- 967 12 Sato, T. *et al.* Paneth cells constitute the niche for Lgr5 stem cells in intestinal crypts. *Nature* **469**, 415-  
968 418, doi:10.1038/nature09637 (2011).
- 969 13 Kuhn, S. & Geyer, M. Formins as effector proteins of Rho GTPases. *Small GTPases* **5**, e29513,  
970 doi:10.4161/sgtp.29513 (2014).
- 971 14 Andersson-Rolf, A. *et al.* Simultaneous paralogue knockout using a CRISPR-concatemer in mouse small  
972 intestinal organoids. *Dev Biol* **420**, 271-277, doi:10.1016/j.ydbio.2016.10.016 (2016).
- 973 15 Merenda, A. *et al.* A Protocol for Multiple Gene Knockout in Mouse Small Intestinal Organoids Using a  
974 CRISPR-concatemer. *J Vis Exp*, doi:10.3791/55916 (2017).
- 975 16 Gurney, A. *et al.* Wnt pathway inhibition via the targeting of Frizzled receptors results in decreased  
976 growth and tumorigenicity of human tumors. *Proc Natl Acad Sci U S A* **109**, 11717-11722,  
977 doi:10.1073/pnas.1120068109 (2012).
- 978 17 Habas, R., Kato, Y. & He, X. Wnt/Frizzled activation of Rho regulates vertebrate gastrulation and requires  
979 a novel Formin homology protein Daam1. *Cell* **107**, 843-854, doi:10.1016/s0092-8674(01)00614-6  
980 (2001).
- 981 18 Liu, W. *et al.* Mechanism of activation of the Formin protein Daam1. *Proc Natl Acad Sci U S A* **105**, 210-  
982 215, doi:10.1073/pnas.0707277105 (2008).
- 983 19 Jiang, X., Charlat, O., Zamponi, R., Yang, Y. & Cong, F. Dishevelled promotes Wnt receptor degradation  
984 through recruitment of ZNRF3/RNF43 E3 ubiquitin ligases. *Mol Cell* **58**, 522-533,  
985 doi:10.1016/j.molcel.2015.03.015 (2015).
- 986 20 Bottcher, A. *et al.* Non-canonical Wnt/PCP signalling regulates intestinal stem cell lineage priming  
987 towards enteroendocrine and Paneth cell fates. *Nat Cell Biol* **23**, 23-31, doi:10.1038/s41556-020-00617-  
988 2 (2021).
- 989 21 Nishita, M. *et al.* Filopodia formation mediated by receptor tyrosine kinase Ror2 is required for Wnt5a-  
990 induced cell migration. *J Cell Biol* **175**, 555-562, doi:10.1083/jcb.200607127 (2006).
- 991 22 Jaiswal, R. *et al.* The formin Daam1 and fascin directly collaborate to promote filopodia formation. *Curr*  
992 *Biol* **23**, 1373-1379, doi:10.1016/j.cub.2013.06.013 (2013).
- 993 23 Luo, W., Lieu, Z. Z., Manser, E., Bershadsky, A. D. & Sheetz, M. P. Formin DAAM1 Organizes Actin  
994 Filaments in the Cytoplasmic Nodal Actin Network. *PLoS One* **11**, e0163915,  
995 doi:10.1371/journal.pone.0163915 (2016).
- 996 24 Niehrs, C. The role of *Xenopus* developmental biology in unraveling Wnt signalling and antero-posterior  
997 axis formation. *Dev Biol* **482**, 1-6, doi:10.1016/j.ydbio.2021.11.006 (2022).
- 998 25 Glinka, A. *et al.* Dickkopf-1 is a member of a new family of secreted proteins and functions in head

- 999 induction. *Nature* **391**, 357-362, doi:10.1038/34848 (1998).
- 1000 26 Ding, Y. *et al.* Bighead is a Wnt antagonist secreted by the *Xenopus* Spemann organizer that promotes  
1001 Lrp6 endocytosis. *Proc Natl Acad Sci U S A* **115**, E9135-E9144, doi:10.1073/pnas.1812117115 (2018).
- 1002 27 Colozza, G. *et al.* Wnt-inducible Lrp6-APEX2 interacting proteins identify ESCRT machinery and Trk-fused  
1003 gene as components of the Wnt signaling pathway. *Sci Rep* **10**, 21555, doi:10.1038/s41598-020-78019-  
1004 5 (2020).
- 1005 28 Bader, E. *et al.* Identification of proliferative and mature beta-cells in the islets of Langerhans. *Nature*  
1006 **535**, 430-434, doi:10.1038/nature18624 (2016).
- 1007 29 Koo, B. K., van Es, J. H., van den Born, M. & Clevers, H. Porcupine inhibitor suppresses paracrine Wnt-  
1008 driven growth of Rnf43;Znrf3-mutant neoplasia. *Proc Natl Acad Sci U S A* **112**, 7548-7550,  
1009 doi:10.1073/pnas.1508113112 (2015).
- 1010 30 Kida, Y. S., Sato, T., Miyasaka, K. Y., Suto, A. & Ogura, T. Daam1 regulates the endocytosis of EphB during  
1011 the convergent extension of the zebrafish notochord. *Proc Natl Acad Sci U S A* **104**, 6708-6713,  
1012 doi:10.1073/pnas.0608946104 (2007).
- 1013 31 Kim, G. H. & Han, J. K. Essential role for beta-arrestin 2 in the regulation of *Xenopus* convergent  
1014 extension movements. *EMBO J* **26**, 2513-2526, doi:10.1038/sj.emboj.7601688 (2007).
- 1015 32 Colozza, G. & Koo, B. K. Wnt/beta-catenin signaling: Structure, assembly and endocytosis of the  
1016 signalosome. *Dev Growth Differ* **63**, 199-218, doi:10.1111/dgd.12718 (2021).
- 1017 33 Lian, G. *et al.* Filamin A- and formin 2-dependent endocytosis regulates proliferation via the canonical  
1018 Wnt pathway. *Development* **143**, 4509-4520, doi:10.1242/dev.139295 (2016).
- 1019 34 Radaszkiewicz, T. *et al.* RNF43 inhibits WNT5A-driven signaling and suppresses melanoma invasion and  
1020 resistance to the targeted therapy. *Elife* **10**, doi:10.7554/eLife.65759 (2021).
- 1021 35 de Lau, W., Peng, W. C., Gros, P. & Clevers, H. The R-spondin/Lgr5/Rnf43 module: regulator of Wnt signal  
1022 strength. *Genes Dev* **28**, 305-316, doi:10.1101/gad.235473.113 (2014).
- 1023 36 Hao, H. X., Jiang, X. & Cong, F. Control of Wnt Receptor Turnover by R-spondin-ZNRF3/RNF43 Signaling  
1024 Module and Its Dysregulation in Cancer. *Cancers (Basel)* **8**, doi:10.3390/cancers8060054 (2016).
- 1025 37 Zheng, G. X. *et al.* Massively parallel digital transcriptional profiling of single cells. *Nat Commun* **8**, 14049,  
1026 doi:10.1038/ncomms14049 (2017).
- 1027 38 Hao, Y. *et al.* Integrated analysis of multimodal single-cell data. *Cell* **184**, 3573-3587 e3529,  
1028 doi:10.1016/j.cell.2021.04.048 (2021).
- 1029 39 McGinnis, C. S., Murrow, L. M. & Gartner, Z. J. DoubletFinder: Doublet Detection in Single-Cell RNA  
1030 Sequencing Data Using Artificial Nearest Neighbors. *Cell Syst* **8**, 329-337 e324,  
1031 doi:10.1016/j.cels.2019.03.003 (2019).
- 1032 40 Korsunsky, I. *et al.* Fast, sensitive and accurate integration of single-cell data with Harmony. *Nat Methods*  
1033 **16**, 1289-1296, doi:10.1038/s41592-019-0619-0 (2019).
- 1034 41 Fujii, M. *et al.* Human Intestinal Organoids Maintain Self-Renewal Capacity and Cellular Diversity in  
1035 Niche-Inspired Culture Condition. *Cell Stem Cell* **23**, 787-793 e786, doi:10.1016/j.stem.2018.11.016  
1036 (2018).
- 1037 42 Bunis, D. G., Andrews, J., Fragiadakis, G. K., Burt, T. D. & Sirota, M. dittoSeq: Universal User-Friendly  
1038 Single-Cell and Bulk RNA Sequencing Visualization Toolkit. *Bioinformatics* **36**, 5535-5536,  
1039 doi:10.1093/bioinformatics/btaa1011 (2020).
- 1040 43 Love, M. I., Huber, W. & Anders, S. Moderated estimation of fold change and dispersion for RNA-seq  
1041 data with DESeq2. *Genome Biol* **15**, 550, doi:10.1186/s13059-014-0550-8 (2014).
- 1042 44 Paclikova, P., Bernatik, O., Radaszkiewicz, T. W. & Bryja, V. The N-Terminal Part of the Dishevelled DEP  
1043 Domain Is Required for Wnt/beta-Catenin Signaling in Mammalian Cells. *Mol Cell Biol* **37**,  
1044 doi:10.1128/MCB.00145-17 (2017).
- 1045 45 van Ineveld, R. L., Ariese, H. C. R., Wehrens, E. J., Dekkers, J. F. & Rios, A. C. Single-Cell Resolution Three-  
1046 Dimensional Imaging of Intact Organoids. *J Vis Exp*, doi:10.3791/60709 (2020).
- 1047 46 Ding, Y. *et al.* Genome-wide analysis of dorsal and ventral transcriptomes of the *Xenopus laevis* gastrula.  
1048 *Dev Biol* **426**, 176-187, doi:10.1016/j.ydbio.2016.02.032 (2017).
- 1049 47 Ren, X. D., Kiosses, W. B. & Schwartz, M. A. Regulation of the small GTP-binding protein Rho by cell  
1050 adhesion and the cytoskeleton. *EMBO J* **18**, 578-585, doi:10.1093/emboj/18.3.578 (1999).
- 1051 48 Colozza, G. & De Robertis, E. M. Dact-4 is a *Xenopus laevis* Spemann organizer gene related to the  
1052 Dapper/Frodo antagonist of beta-catenin family of proteins. *Gene Expr Patterns* **38**, 119153,  
1053 doi:10.1016/j.gep.2020.119153 (2020).
- 1054 49 Nieuwkoop, P. D. & Faber, J. *Normal Table of Xenopus laevis (Daudin)*. (North-Holland Publishing  
1055 Company, Amsterdam, 1967).

1056 50 Ossipova, O., Chuykin, I., Chu, C. W. & Sokol, S. Y. Vangl2 cooperates with Rab11 and Myosin V to regulate  
1057 apical constriction during vertebrate gastrulation. *Development* **142**, 99-107, doi:10.1242/dev.111161  
1058 (2015).  
1059 51 Session, A. M. *et al.* Genome evolution in the allotetraploid frog *Xenopus laevis*. *Nature* **538**, 336-343,  
1060 doi:10.1038/nature19840 (2016).  
1061 52 Colozza, G. & De Robertis, E. M. Maternal syntabulin is required for dorsal axis formation and is a germ  
1062 plasm component in *Xenopus*. *Differentiation* **88**, 17-26, doi:10.1016/j.diff.2014.03.002 (2014).  
1063
